# Supplementary material for: Boron buckminsterfullerene
Source: Royal Society of Chemistry journal article supplement (doi:10.1039/d6sc02674e), 2026-05-22
Supplement: d6sc02674e1.pdf [file d6sc02674e1.pdf]

## Supporting Information

### **Boron Buckminsterfullerene**

Hyun Wook Choi, Yang-Yang Zhang, Deniz Kahraman, Cong-Qiao Xu, Han-Wen Gao, Jun Li, and Lai-Sheng Wang

Corresponding authors: Jun Li, [junli@tsinghua.edu.cn](mailto:junli@tsinghua.edu.cn); Lai-Sheng Wang, [lai-sheng\\_wang@brown.edu](mailto:lai-sheng_wang@brown.edu)

#### **The PDF file includes:**

Experimental and computational methods

Figures S1 to S10

Tables S1 to S12

References

## Experimental and computational methods

**Photoelectron spectroscopy.** The experiment was conducted on an apparatus, consisting of a laser vaporization supersonic cluster source, a time-of-flight (TOF) mass spectrometer, and a magnetic-bottle type PES apparatus. Details of the apparatus can be found elsewhere.<sup>1</sup> Clusters were produced by directing an intense laser pulse onto a disk target made of <sup>11</sup>B-enriched boron powder (97% isotopic purity). The laser-induced plasma was quenched by a high-pressure helium carrier gas seeded with 20% argon, initiating nucleation. Clusters formed inside the nozzle were entrained in the carrier gas and underwent a supersonic expansion to create cold clusters. After passing a skimmer, the collimated cluster beam traveled to the extraction zone of the TOF mass spectrometer. Negatively charged boron clusters ( $B_n^-$ ) were extracted perpendicularly into the free flight zone of the TOF mass analyzer. The  $B_{80}^-$  cluster was mass selected and decelerated before being photodetached by a 193 nm (6.424 eV) laser beam from an ArF excimer laser. More than 90% of the photoelectrons emitted in all  $4\pi$  solid angles were collimated by a magnetic-bottle and analyzed in a 3.5 m long TOF tube. The electron kinetic energies were calibrated by the known spectrum of the  $Bi^-$  atomic anion. The kinetic energy (Ke) resolution ( $\Delta Ke/Ke$ ) of the magnetic-bottle analyzer was 2.5% or  $\sim 25$  meV for 1 eV electrons.

**Theoretical and computational methods.** The global-minimum structural searches of the anionic  $B_{80}^-$  and neutral  $B_{80}$  clusters were performed using the constrained basin-hopping algorithm in the TGMIn (v3.0) program,<sup>2-4</sup> interfaced with the Gaussian 16 package.<sup>5</sup> The geometries of the isomers were re-optimized using the generalized gradient approximation (GGA) with the hybrid B3LYP functional<sup>6,7</sup> and split-valence double-zeta plus polarization 6-31G(d) basis sets.<sup>8</sup> In total, 5284 local minima were explored. Vibrational frequency calculations were performed to confirm the true minima on the potential energy surfaces. Then, selected low-lying isomers are re-optimized with a variety of different DFT functionals and the 6-31G(d) basis set.<sup>9</sup> The buckyball isomer was re-optimized at the MP2 level with the resolution-of-the-identity (RI) approximation and the 6-31G(d) basis set<sup>10</sup> by using the ORCA package.<sup>11</sup>

To compare with experimental data, we computed the vertical detachment energies (VDEs) for selected isomers of  $B_{80}^-$  using the generalized Koopman theory using the Multiwfn package. The computed VDEs were fitted using unit-area Gaussian functions with a width of 0.15 eV (a ratio of 1 to 3 was used for singlet and triplet final states, respectively). The chemical bonding was analyzed using the Adaptive Natural Density Partitioning (AdNDP)<sup>12</sup> within the Gaussian 16 package, using the B3LYP functional and 6-31G(d) basis sets.

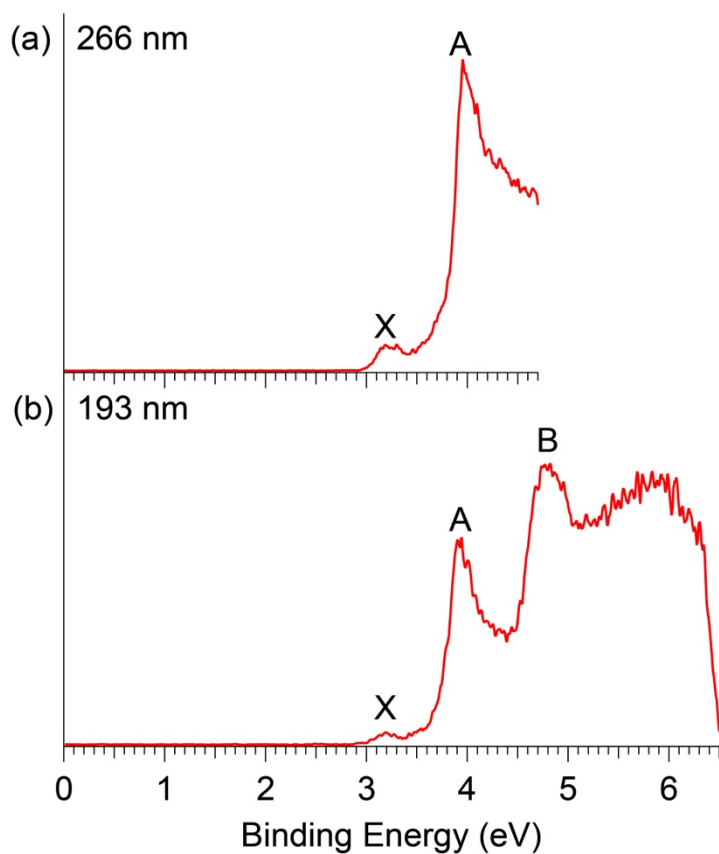

Figure S1. Photoelectron spectroscopy of  $B_{80}^-$  at (a) 266 nm (4.661 eV) and (b) 193 nm (6.424 eV).

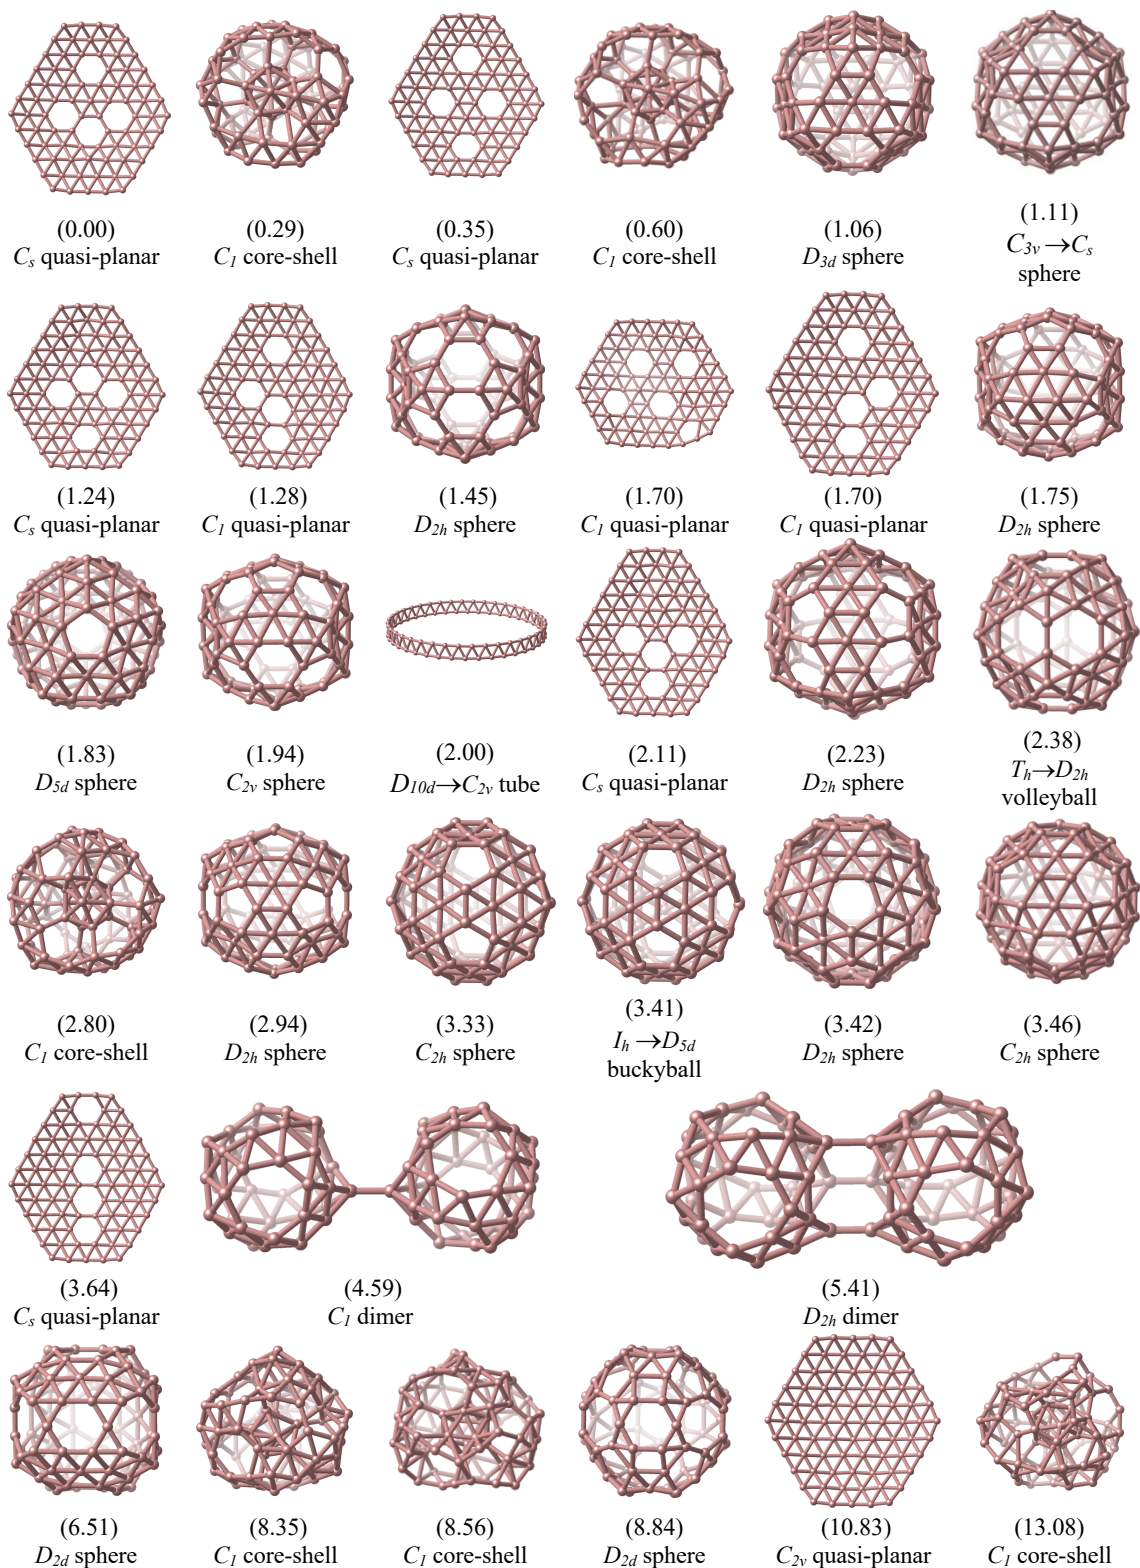

Figure S2. Global minimum searches for  $B_{80}^-$ . Relative energies (in eV) and symmetries of low-lying isomers of the  $B_{80}^-$  anion optimized at the B3LYP/6-31G(d) level. Note that the Jahn-Teller effect reduces the symmetry of the buckyball structure from  $I_h$  in the neutral to  $D_{5d}$  in the anion.

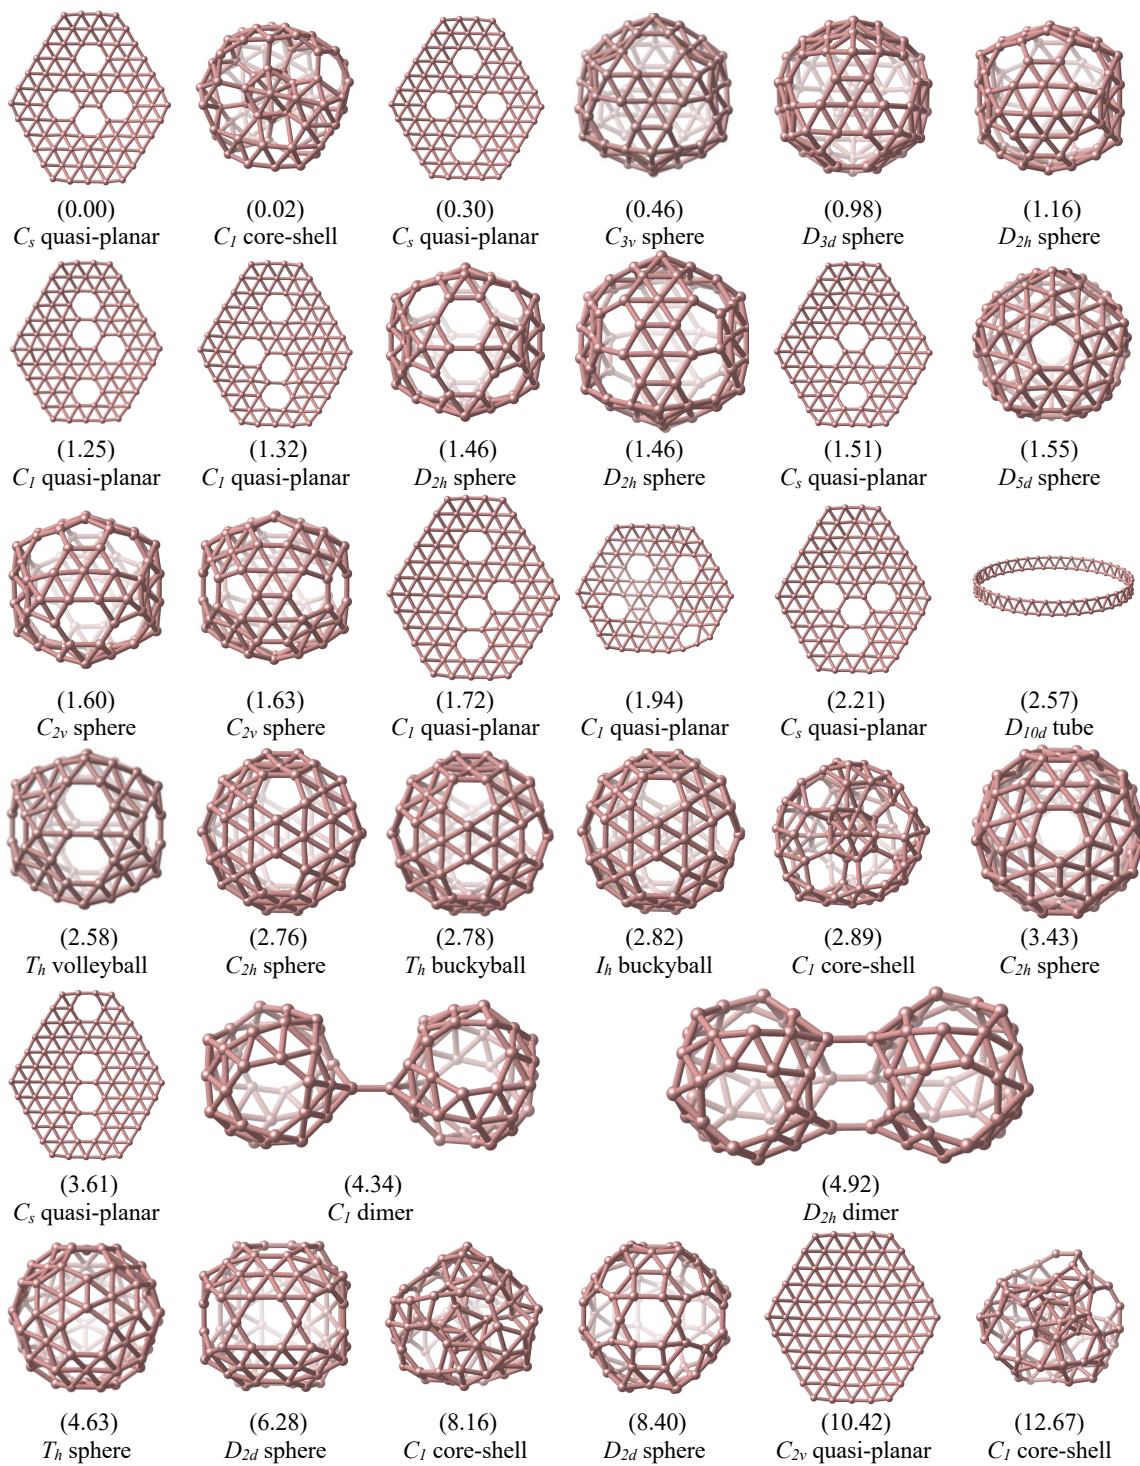

Figure S3. Global minimum searches for  $B_{80}$ . Relative energies (in eV) and symmetries of low-lying isomers of neutral  $B_{80}$  optimized at the B3LYP/6-31G(d) level.

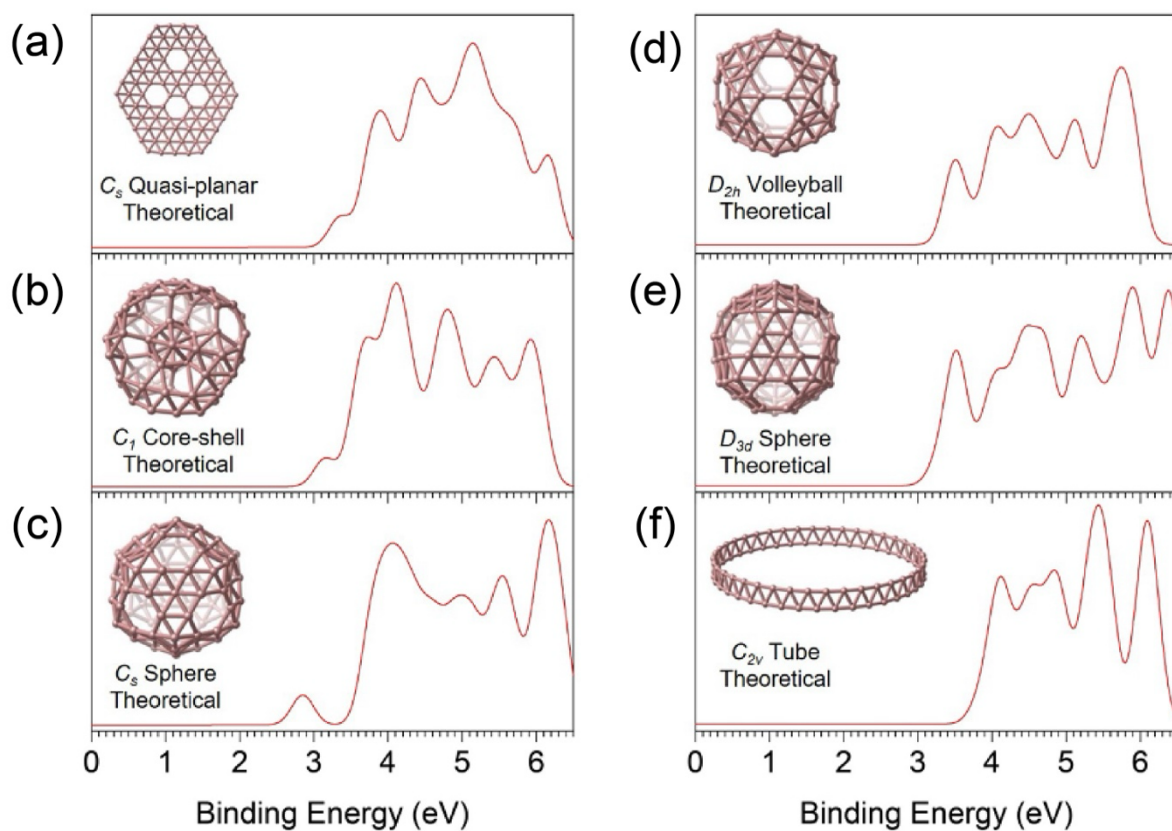

Figure S4. Simulated photoelectron spectra for different structures of  $B_{80}^-$ . (a) The planar structure. (b) The core-shell structure. (c) The  $C_s$  cage structure (corresponding to the neutral  $C_{3v}$  cage). (d) The  $D_{2h}$  volleyball structure (corresponding to the neutral  $T_h$  volleyball structure). (e) The  $D_{3d}$  cage structure. (f) The double ring structure.

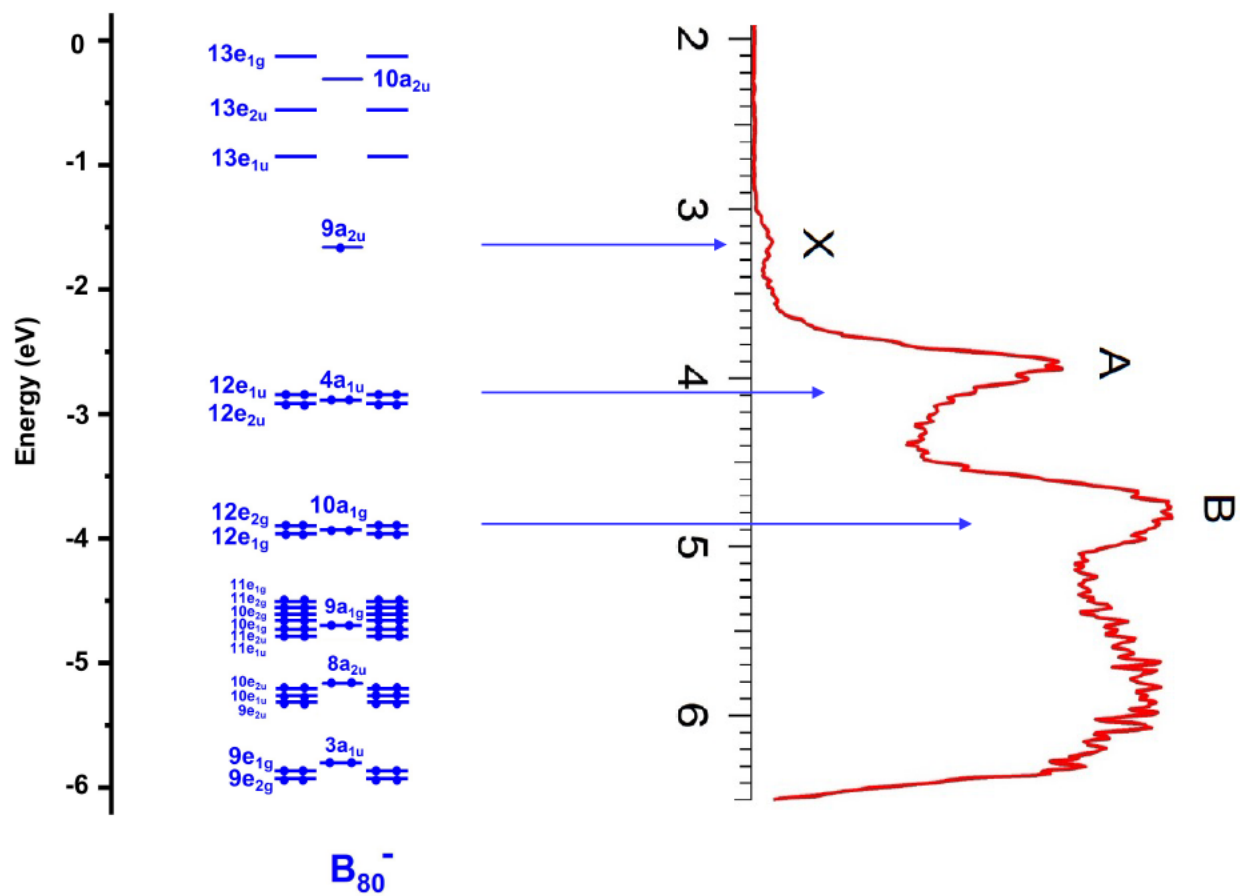

Figure S5. Comparison of the molecular orbital energy levels of  $B_{80}^-$  with the 193 nm photoelectron spectrum.

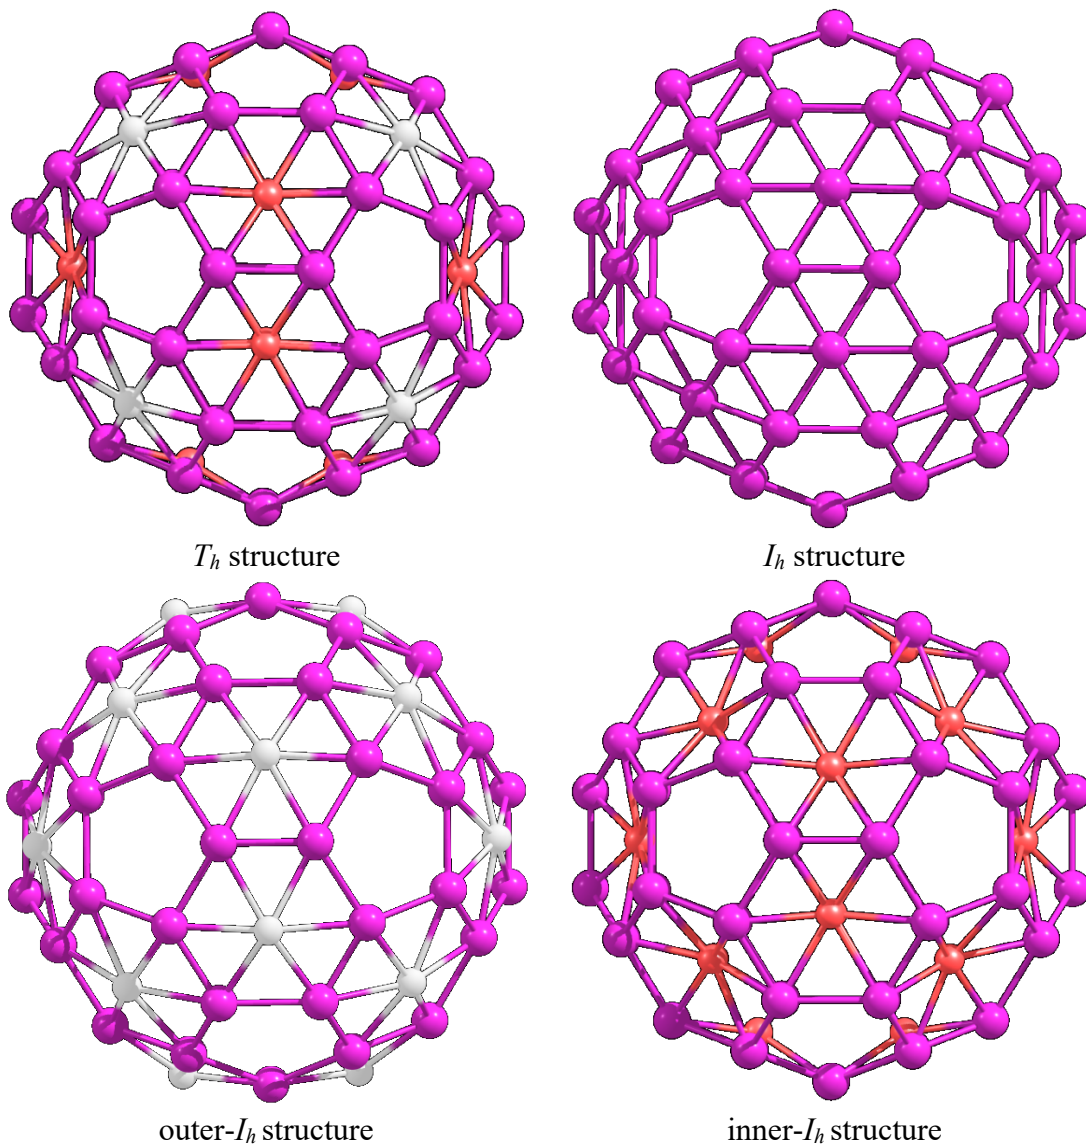

Figure S6. The different symmetries of the B<sub>80</sub> buckyball. The geometrical structure of  $T_h$  and different  $I_h$  structures of the B<sub>80</sub> buckyball. Color codes: white for the protruding B atoms and red for the recessed B atoms.

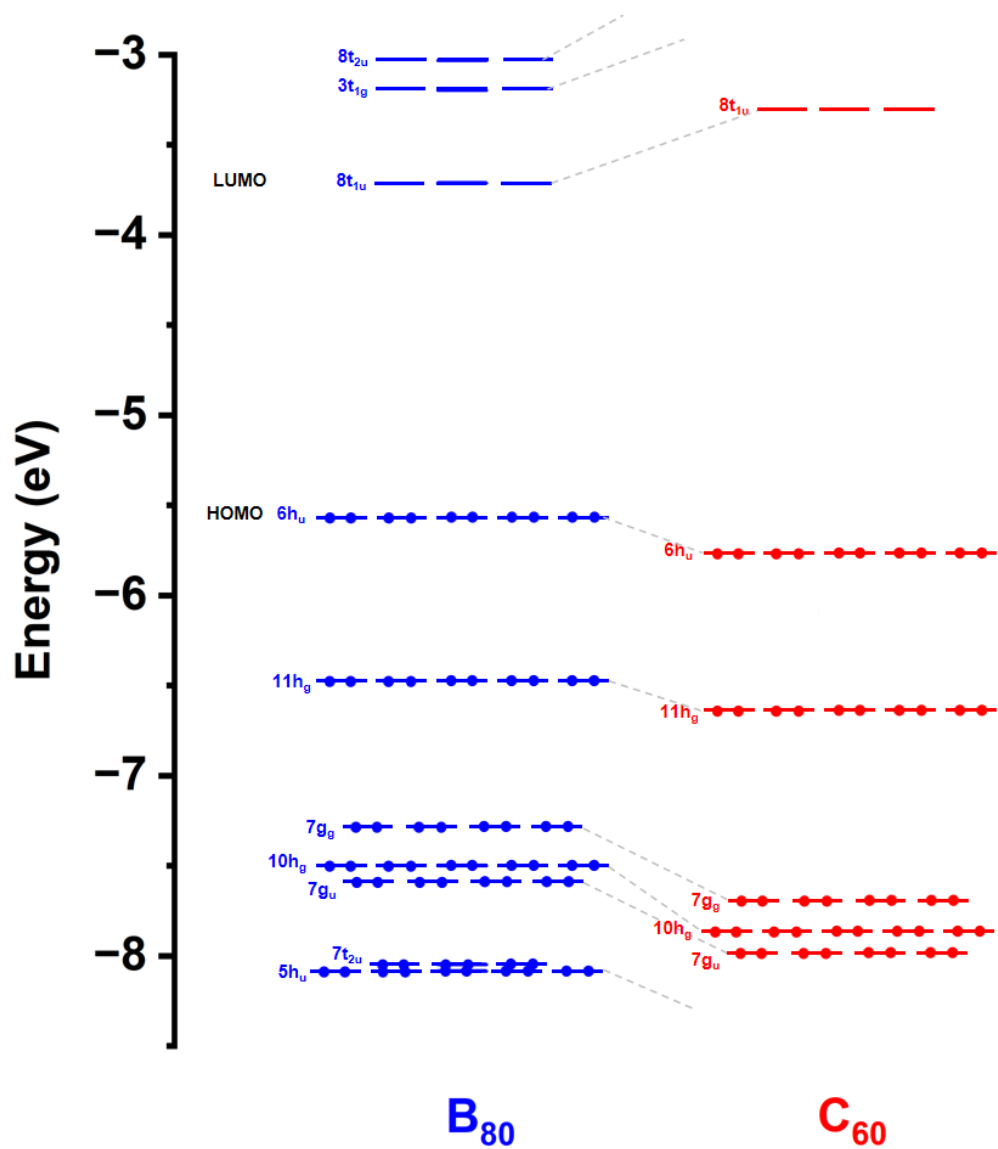

Figure S7. Comparison of the molecular orbital energy levels between the B<sub>80</sub> and C<sub>60</sub> buckyballs. The orbital energies (in eV) are computed at the B3LYP/6-31G(d) level with small frozen cores.

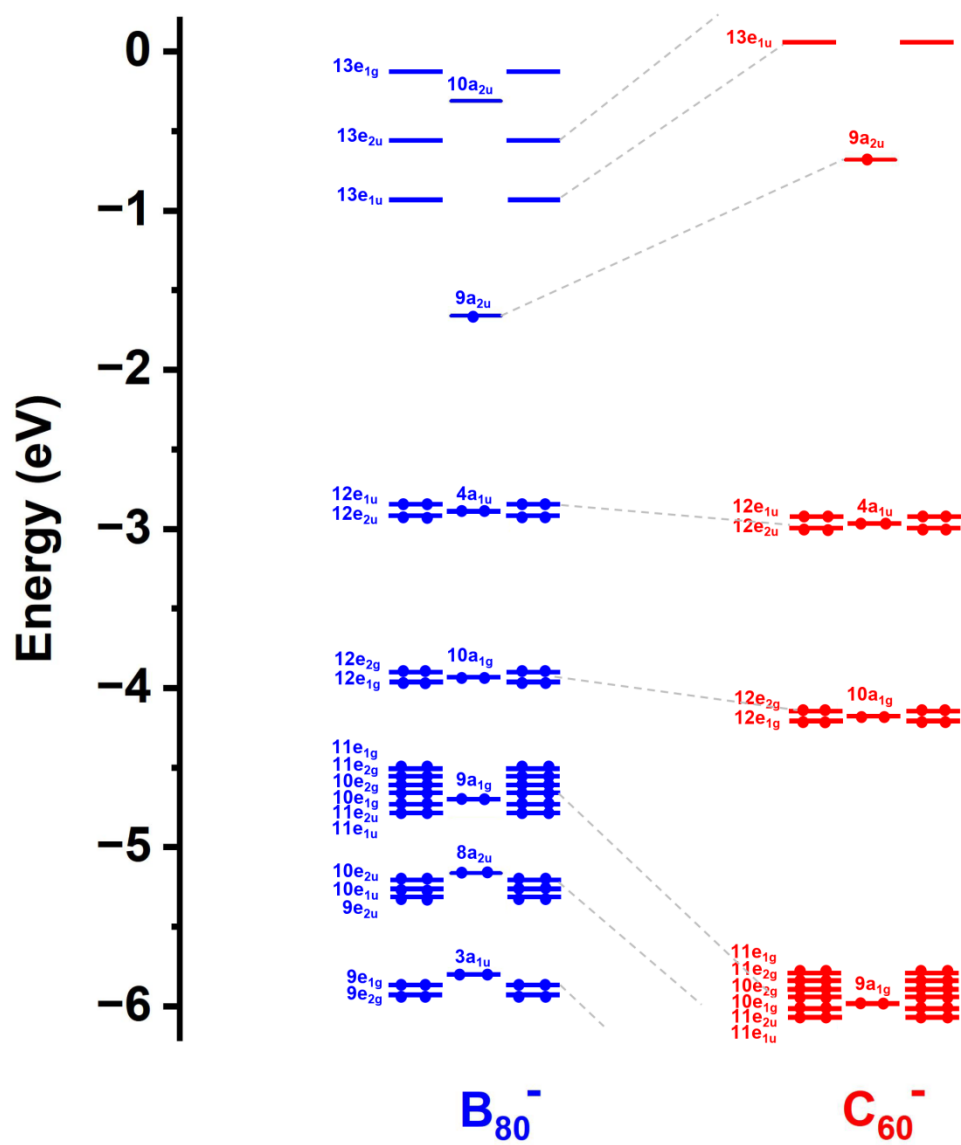

Figure S8. Comparison of the molecular orbital energy levels between  $B_{80}^-$  and  $C_{60}^-$ . The orbital energies (in eV) are computed at the B3LYP/6-31G(d) level with small frozen cores.

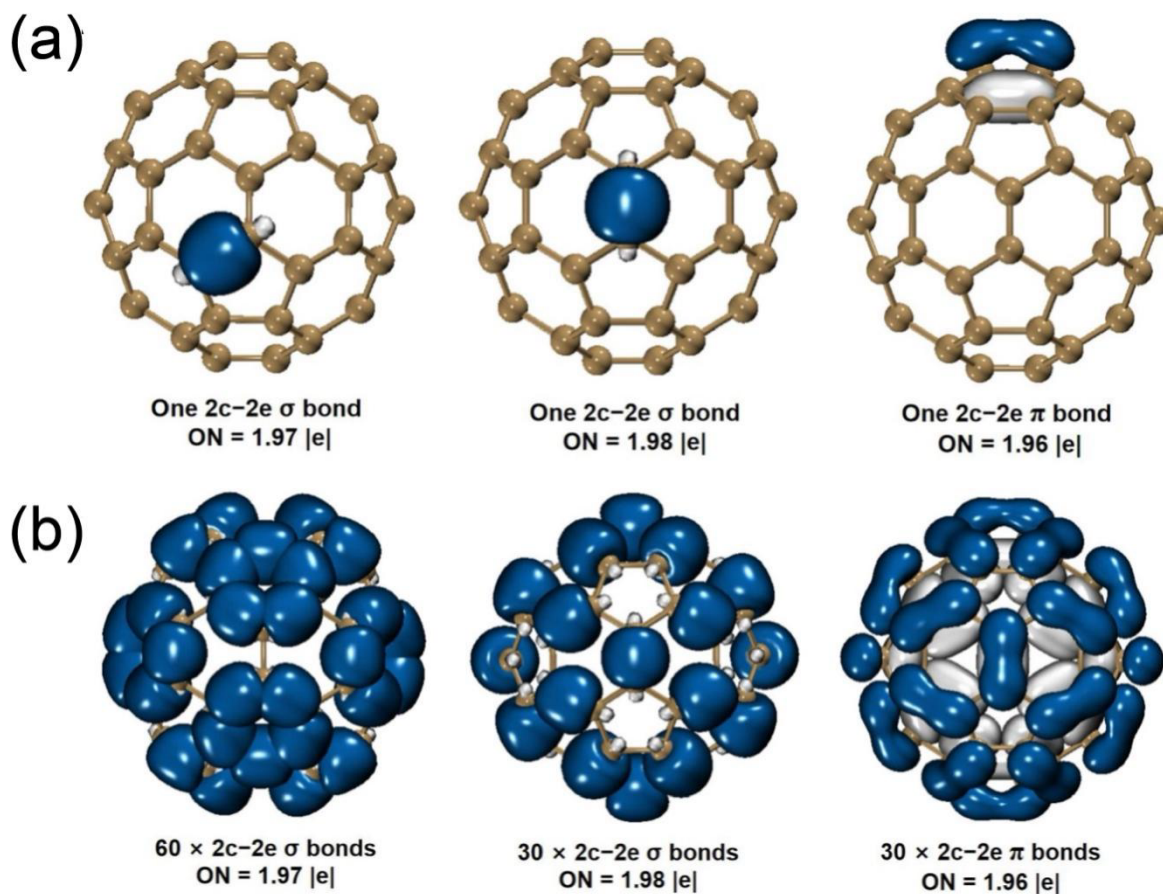

Figure S9. Chemical bonding analyses for the  $C_{60}$  buckyball using the AdNDP method at the B3LYP/6-31G(d) level. (a) The three types of two-center-two electron (2c-2e) bonds. (b) Full sets of bonds for the  $C_{60}$  buckyball. Isovalue is 0.1 a.u. Note that the 60 2c-2e  $\sigma$  bonds on the left of (b) correspond to the C–C single bonds around the 12 pentagons. The 30 2c-2e  $\sigma$  and  $\pi$  bonds together correspond to the 30 C=C double bonds between the hexagons.

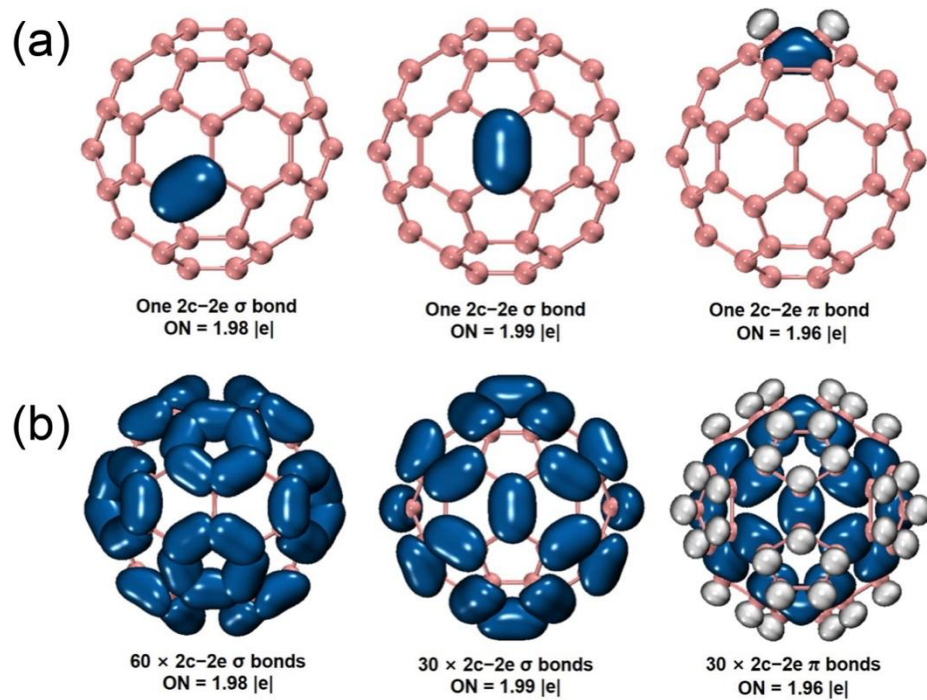

Figure S10. Chemical bonding analyses for the  $[\text{B}_{60}]^{60-}[\text{X}]_{20}^{60+}$  (X is a dummy atom) hypothetical buckyball from AdNDP bonding analyses at the B3LYP/6-31G(d) level. (a) The three types of two-center-two electron (2c-2e) bonds. (b) Full sets of bonds for the  $[\text{B}_{60}]^{60-}[\text{X}]_{20}^{60+}$  buckyball. Isovalue is 0.1 a.u. Note the similarity with that for  $\text{C}_{60}$  in Fig. S9.

Table S1. The relative energies (in eV) of selected neutral B<sub>80</sub> optimized at different DFT levels with the 6-31G(d) basis set. The Grimme dispersion correction was abbreviated as D4 by using ORCA package.

| Method    | Buckyball<br>( <i>I<sub>h</sub></i> ) | Core-shell<br>( <i>C<sub>1</sub></i> ) | Sphere<br>( <i>D<sub>3d</sub></i> ) | Sphere<br>( <i>C<sub>3v</sub></i> ) | Volleyball<br>( <i>T<sub>h</sub></i> ) | Quasi-planar<br>( <i>C<sub>s</sub></i> ) | Tube<br>( <i>D<sub>10d</sub></i> ) |
|-----------|---------------------------------------|----------------------------------------|-------------------------------------|-------------------------------------|----------------------------------------|------------------------------------------|------------------------------------|
| LDA       | 0.000                                 | -3.278                                 | 0.317                               | 1.910                               | 2.172                                  | 3.946                                    | 20.084                             |
| M06-2X    | 0.000                                 | -4.198                                 | 0.051                               | 0.109                               | 2.147                                  | 1.864                                    | -                                  |
| wB97X-D4  | 0.000                                 | -8.489                                 | 0.578                               | 0.224                               | 2.846                                  | 3.408                                    | 14.952                             |
| OLYP-D4   | 0.000                                 | -8.742                                 | 0.350                               | 2.094                               | 2.832                                  | 3.962                                    | 18.701                             |
| HF-D4     | 0.000                                 | -10.444                                | -0.626                              | -3.601                              | -0.256                                 | -1.050                                   | 1.675                              |
| BLYP-D4   | 0.000                                 | -5.753                                 | -1.595                              | -1.563                              | -0.827                                 | -0.438                                   | 6.123                              |
| BP86-D4   | 0.000                                 | -5.682                                 | -0.669                              | 0.183                               | 0.797                                  | 1.965                                    | 12.787                             |
| GLYP-D4   | 0.000                                 | -8.731                                 | -1.158                              | -0.686                              | 0.135                                  | 1.553                                    | 11.092                             |
| mPWLYP-D4 | 0.000                                 | -5.012                                 | -1.689                              | -1.738                              | -1.030                                 | -0.861                                   | 5.344                              |
| PBE-D4    | 0.000                                 | -4.768                                 | -0.361                              | 0.764                               | 1.298                                  | 2.124                                    | 14.220                             |
| PBE0-D4   | 0.000                                 | -5.759                                 | -0.094                              | 0.746                               | 2.354                                  | 2.494                                    | 14.535                             |
| PW91-D4   | 0.000                                 | -4.455                                 | -0.604                              | 0.309                               | 0.856                                  | 1.555                                    | 12.535                             |
| PWP-D4    | 0.000                                 | -3.532                                 | -0.908                              | -0.262                              | 0.270                                  | 0.768                                    | 10.180                             |
| REVPBE-D4 | 0.000                                 | -6.877                                 | -0.230                              | 1.032                               | 1.702                                  | 2.659                                    | 15.336                             |
| RPBE-D4   | 0.000                                 | -7.020                                 | -0.205                              | 1.090                               | 1.780                                  | 2.646                                    | 15.448                             |
| TPSS-D4   | 0.000                                 | -6.817                                 | -0.698                              | 0.128                               | 0.906                                  | 1.238                                    | 11.627                             |
| TPSSh-D4  | 0.000                                 | -6.979                                 | -0.551                              | 0.192                               | 1.373                                  | 1.457                                    | 11.905                             |
| XLYP-D4   | 0.000                                 | -6.718                                 | -1.516                              | -1.392                              | -0.603                                 | 0.000                                    | 7.606                              |

Table S2. The computed VDEs, electron configurations, and final electronic states using the generalized Koopmans' theorem for the  $B_{80}^-$  ( $D_{5d}$ ,  ${}^2A_{2u}$ ) buckyball, in comparison with the experimental results. The bold-face indicates the orbitals from which an electron is detached.

| Feature | State        | Configuration                                                                                                                                         | Theo. VDE <sup>a</sup> | Expt. VDE |
|---------|--------------|-------------------------------------------------------------------------------------------------------------------------------------------------------|------------------------|-----------|
| X       | ${}^1A_{2u}$ | $\{\dots 9a_{1g}^2 10e_{1g}^4 10e_{2g}^4 11e_{2g}^4 11e_{1g}^4 12e_{1g}^4 10a_{1g}^2 12e_{2g}^4 12e_{2u}^4 4a_{1u}^2 12e_{1u}^4 \mathbf{9a_{2u}^0}\}$ | 3.22                   | 3.2       |
| A       | ${}^3E_{1g}$ | $\{\dots 9a_{1g}^2 10e_{1g}^4 10e_{2g}^4 11e_{2g}^4 11e_{1g}^4 12e_{1g}^4 10a_{1g}^2 12e_{2g}^4 12e_{2u}^4 4a_{1u}^2 \mathbf{12e_{1u}^3} 9a_{2u}^1\}$ | 4.15                   | 4.0       |
|         | ${}^1E_{1g}$ | $\{\dots 9a_{1g}^2 10e_{1g}^4 10e_{2g}^4 11e_{2g}^4 11e_{1g}^4 12e_{1g}^4 10a_{1g}^2 12e_{2g}^4 12e_{2u}^4 4a_{1u}^2 \mathbf{12e_{1u}^3} 9a_{2u}^1\}$ | 4.18                   |           |
|         | ${}^3A_{2g}$ | $\{\dots 9a_{1g}^2 10e_{1g}^4 10e_{2g}^4 11e_{2g}^4 11e_{1g}^4 12e_{1g}^4 10a_{1g}^2 12e_{2g}^4 12e_{2u}^4 \mathbf{4a_{1u}^1} 12e_{1u}^4 9a_{2u}^1\}$ | 4.17                   |           |
|         | ${}^1A_{2g}$ | $\{\dots 9a_{1g}^2 10e_{1g}^4 10e_{2g}^4 11e_{2g}^4 11e_{1g}^4 12e_{1g}^4 10a_{1g}^2 12e_{2g}^4 12e_{2u}^4 \mathbf{4a_{1u}^1} 12e_{1u}^4 9a_{2u}^1\}$ | 4.19                   |           |
|         | ${}^3E_{2g}$ | $\{\dots 9a_{1g}^2 10e_{1g}^4 10e_{2g}^4 11e_{2g}^4 11e_{1g}^4 12e_{1g}^4 10a_{1g}^2 12e_{2g}^4 \mathbf{12e_{2u}^3} 4a_{1u}^2 12e_{1u}^4 9a_{2u}^1\}$ | 4.22                   |           |
|         | ${}^1E_{2g}$ | $\{\dots 9a_{1g}^2 10e_{1g}^4 10e_{2g}^4 11e_{2g}^4 11e_{1g}^4 12e_{1g}^4 10a_{1g}^2 12e_{2g}^4 \mathbf{12e_{2u}^3} 4a_{1u}^2 12e_{1u}^4 9a_{2u}^1\}$ | 4.24                   |           |
| B       | ${}^3E_{2u}$ | $\{\dots 9a_{1g}^2 10e_{1g}^4 10e_{2g}^4 11e_{2g}^4 11e_{1g}^4 12e_{1g}^4 10a_{1g}^2 \mathbf{12e_{2g}^3} 12e_{2u}^4 4a_{1u}^2 12e_{1u}^4 9a_{2u}^1\}$ | 5.17                   | 4.8       |
|         | ${}^1E_{2u}$ | $\{\dots 9a_{1g}^2 10e_{1g}^4 10e_{2g}^4 11e_{2g}^4 11e_{1g}^4 12e_{1g}^4 10a_{1g}^2 \mathbf{12e_{2g}^3} 12e_{2u}^4 4a_{1u}^2 12e_{1u}^4 9a_{2u}^1\}$ | 5.19                   |           |
|         | ${}^3A_{2u}$ | $\{\dots 9a_{1g}^2 10e_{1g}^4 10e_{2g}^4 11e_{2g}^4 11e_{1g}^4 12e_{1g}^4 \mathbf{10a_{1g}^1} 12e_{2g}^4 12e_{2u}^4 4a_{1u}^2 12e_{1u}^4 9a_{2u}^1\}$ | 5.20                   |           |
|         | ${}^1A_{2u}$ | $\{\dots 9a_{1g}^2 10e_{1g}^4 10e_{2g}^4 11e_{2g}^4 11e_{1g}^4 12e_{1g}^4 \mathbf{10a_{1g}^1} 12e_{2g}^4 12e_{2u}^4 4a_{1u}^2 12e_{1u}^4 9a_{2u}^1\}$ | 5.22                   |           |
|         | ${}^3E_{1u}$ | $\{\dots 9a_{1g}^2 10e_{1g}^4 10e_{2g}^4 11e_{2g}^4 11e_{1g}^4 \mathbf{12e_{1g}^3} 10a_{1g}^2 12e_{2g}^4 12e_{2u}^4 4a_{1u}^2 12e_{1u}^4 9a_{2u}^1\}$ | 5.24                   |           |
|         | ${}^1E_{1u}$ | $\{\dots 9a_{1g}^2 10e_{1g}^4 10e_{2g}^4 11e_{2g}^4 11e_{1g}^4 \mathbf{12e_{1g}^3} 10a_{1g}^2 12e_{2g}^4 12e_{2u}^4 4a_{1u}^2 12e_{1u}^4 9a_{2u}^1\}$ | 5.26                   |           |
|         | ${}^3E_{1u}$ | $\{\dots 9a_{1g}^2 10e_{1g}^4 10e_{2g}^4 11e_{2g}^4 \mathbf{11e_{1g}^3} 12e_{1g}^4 10a_{1g}^2 12e_{2g}^4 12e_{2u}^4 4a_{1u}^2 12e_{1u}^4 9a_{2u}^1\}$ | 6.07                   | ~6.0      |
|         | ${}^1E_{1u}$ | $\{\dots 9a_{1g}^2 10e_{1g}^4 10e_{2g}^4 11e_{2g}^4 \mathbf{11e_{1g}^3} 12e_{1g}^4 10a_{1g}^2 12e_{2g}^4 12e_{2u}^4 4a_{1u}^2 12e_{1u}^4 9a_{2u}^1\}$ | 6.09                   |           |
|         | ${}^3E_{2u}$ | $\{\dots 9a_{1g}^2 10e_{1g}^4 10e_{2g}^4 \mathbf{11e_{2g}^3} 11e_{1g}^4 12e_{1g}^4 10a_{1g}^2 12e_{2g}^4 12e_{2u}^4 4a_{1u}^2 12e_{1u}^4 9a_{2u}^1\}$ | 6.15                   |           |
|         | ${}^1E_{2u}$ | $\{\dots 9a_{1g}^2 10e_{1g}^4 10e_{2g}^4 \mathbf{11e_{2g}^3} 11e_{1g}^4 12e_{1g}^4 10a_{1g}^2 12e_{2g}^4 12e_{2u}^4 4a_{1u}^2 12e_{1u}^4 9a_{2u}^1\}$ | 6.18                   |           |
|         | ${}^3E_{2u}$ | $\{\dots 9a_{1g}^2 10e_{1g}^4 \mathbf{10e_{2g}^3} 11e_{2g}^4 11e_{1g}^4 12e_{1g}^4 10a_{1g}^2 12e_{2g}^4 12e_{2u}^4 4a_{1u}^2 12e_{1u}^4 9a_{2u}^1\}$ | 6.20                   |           |
|         | ${}^1E_{2u}$ | $\{\dots 9a_{1g}^2 10e_{1g}^4 \mathbf{10e_{2g}^3} 11e_{2g}^4 11e_{1g}^4 12e_{1g}^4 10a_{1g}^2 12e_{2g}^4 12e_{2u}^4 4a_{1u}^2 12e_{1u}^4 9a_{2u}^1\}$ | 6.23                   |           |
|         | ${}^3E_{1u}$ | $\{\dots 9a_{1g}^2 \mathbf{10e_{1g}^3} 10e_{2g}^4 11e_{2g}^4 11e_{1g}^4 12e_{1g}^4 10a_{1g}^2 12e_{2g}^4 12e_{2u}^4 4a_{1u}^2 12e_{1u}^4 9a_{2u}^1\}$ | 6.27                   |           |
|         | ${}^1E_{1u}$ | $\{\dots 9a_{1g}^2 \mathbf{10e_{1g}^3} 10e_{2g}^4 11e_{2g}^4 11e_{1g}^4 12e_{1g}^4 10a_{1g}^2 12e_{2g}^4 12e_{2u}^4 4a_{1u}^2 12e_{1u}^4 9a_{2u}^1\}$ | 6.29                   |           |
|         | ${}^3A_{2u}$ | $\{\dots \mathbf{9a_{1g}^1} 10e_{1g}^4 10e_{2g}^4 11e_{2g}^4 11e_{1g}^4 12e_{1g}^4 10a_{1g}^2 12e_{2g}^4 12e_{2u}^4 4a_{1u}^2 12e_{1u}^4 9a_{2u}^1\}$ | 6.32                   |           |
|         | ${}^1A_{2u}$ | $\{\dots \mathbf{9a_{1g}^1} 10e_{1g}^4 10e_{2g}^4 11e_{2g}^4 11e_{1g}^4 12e_{1g}^4 10a_{1g}^2 12e_{2g}^4 12e_{2u}^4 4a_{1u}^2 12e_{1u}^4 9a_{2u}^1\}$ | 6.34                   |           |

Table S3. The computed VDEs, electron configurations, and final electronic states using the generalized Koopmans' theorem for the  $B_{80}^-$  ( $C_s$ ,  ${}^2A'$ ) quasi-planar. The bold-face indicates the orbitals from which an electron is detached.

| State     | Configuration                                                                                                                                                                                                                    | Theo. VDE <sup>a</sup> |
|-----------|----------------------------------------------------------------------------------------------------------------------------------------------------------------------------------------------------------------------------------|------------------------|
| ${}^1A'$  | {...89a <sup>2</sup> 102a <sup>2</sup> 90a <sup>2</sup> 103a <sup>2</sup> 104a <sup>2</sup> 105a <sup>2</sup> 91a <sup>2</sup> 92a <sup>2</sup> 106a <sup>2</sup> 93a <sup>2</sup> 107a <sup>2</sup> <b>108a</b> <sup>0</sup> }  | 3.35                   |
| ${}^3A'$  | {...89a <sup>2</sup> 102a <sup>2</sup> 90a <sup>2</sup> 103a <sup>2</sup> 104a <sup>2</sup> 105a <sup>2</sup> 91a <sup>2</sup> 92a <sup>2</sup> 106a <sup>2</sup> 93a <sup>2</sup> <b>107a</b> <sup>1</sup> 108a <sup>1</sup> }  | 3.77                   |
| ${}^1A'$  | {...89a <sup>2</sup> 102a <sup>2</sup> 90a <sup>2</sup> 103a <sup>2</sup> 104a <sup>2</sup> 105a <sup>2</sup> 91a <sup>2</sup> 92a <sup>2</sup> 106a <sup>2</sup> 93a <sup>2</sup> <b>107a</b> <sup>1</sup> 108a <sup>1</sup> }  | 3.79                   |
| ${}^3A''$ | {...89a <sup>2</sup> 102a <sup>2</sup> 90a <sup>2</sup> 103a <sup>2</sup> 104a <sup>2</sup> 105a <sup>2</sup> 91a <sup>2</sup> 92a <sup>2</sup> 106a <sup>2</sup> <b>93a</b> <sup>1</sup> 107a <sup>2</sup> 108a <sup>1</sup> }  | 3.99                   |
| ${}^1A''$ | {...89a <sup>2</sup> 102a <sup>2</sup> 90a <sup>2</sup> 103a <sup>2</sup> 104a <sup>2</sup> 105a <sup>2</sup> 91a <sup>2</sup> 92a <sup>2</sup> 106a <sup>2</sup> <b>93a</b> <sup>1</sup> 107a <sup>2</sup> 108a <sup>1</sup> }  | 4.02                   |
| ${}^3A'$  | {...89a <sup>2</sup> 102a <sup>2</sup> 90a <sup>2</sup> 103a <sup>2</sup> 104a <sup>2</sup> 105a <sup>2</sup> 91a <sup>2</sup> 92a <sup>2</sup> <b>106a</b> <sup>1</sup> 93a <sup>2</sup> 107a <sup>2</sup> 108a <sup>1</sup> }  | 4.33                   |
| ${}^1A'$  | {...89a <sup>2</sup> 102a <sup>2</sup> 90a <sup>2</sup> 103a <sup>2</sup> 104a <sup>2</sup> 105a <sup>2</sup> 91a <sup>2</sup> 92a <sup>2</sup> <b>106a</b> <sup>1</sup> 93a <sup>2</sup> 107a <sup>2</sup> 108a <sup>1</sup> }  | 4.35                   |
| ${}^3A''$ | {...89a <sup>2</sup> 102a <sup>2</sup> 90a <sup>2</sup> 103a <sup>2</sup> 104a <sup>2</sup> 105a <sup>2</sup> 91a <sup>2</sup> <b>92a</b> <sup>1</sup> 106a <sup>2</sup> 93a <sup>2</sup> 107a <sup>2</sup> 108a <sup>1</sup> }  | 4.48                   |
| ${}^1A''$ | {...89a <sup>2</sup> 102a <sup>2</sup> 90a <sup>2</sup> 103a <sup>2</sup> 104a <sup>2</sup> 105a <sup>2</sup> 91a <sup>2</sup> <b>92a</b> <sup>1</sup> 106a <sup>2</sup> 93a <sup>2</sup> 107a <sup>2</sup> 108a <sup>1</sup> }  | 4.51                   |
| ${}^3A''$ | {...89a <sup>2</sup> 102a <sup>2</sup> 90a <sup>2</sup> 103a <sup>2</sup> 104a <sup>2</sup> 105a <sup>2</sup> <b>91a</b> <sup>1</sup> 92a <sup>2</sup> 106a <sup>2</sup> 93a <sup>2</sup> 107a <sup>2</sup> 108a <sup>1</sup> }  | 4.73                   |
| ${}^1A''$ | {...89a <sup>2</sup> 102a <sup>2</sup> 90a <sup>2</sup> 103a <sup>2</sup> 104a <sup>2</sup> 105a <sup>2</sup> <b>91a</b> <sup>1</sup> 92a <sup>2</sup> 106a <sup>2</sup> 93a <sup>2</sup> 107a <sup>2</sup> 108a <sup>1</sup> }  | 4.75                   |
| ${}^3A'$  | {...89a <sup>2</sup> 102a <sup>2</sup> 90a <sup>2</sup> 103a <sup>2</sup> 104a <sup>2</sup> <b>105a</b> <sup>1</sup> 91a <sup>2</sup> 92a <sup>2</sup> 106a <sup>2</sup> 93a <sup>2</sup> 107a <sup>2</sup> 108a <sup>1</sup> }  | 4.97                   |
| ${}^1A'$  | {...89a <sup>2</sup> 102a <sup>2</sup> 90a <sup>2</sup> 103a <sup>2</sup> 104a <sup>2</sup> <b>105a</b> <sup>1</sup> 91a <sup>2</sup> 92a <sup>2</sup> 106a <sup>2</sup> 93a <sup>2</sup> 107a <sup>2</sup> 108a <sup>1</sup> }  | 4.99                   |
| ${}^3A'$  | {...89a <sup>2</sup> 102a <sup>2</sup> 90a <sup>2</sup> 103a <sup>2</sup> <b>104a</b> <sup>1</sup> 105a <sup>2</sup> 91a <sup>2</sup> 92a <sup>2</sup> 106a <sup>2</sup> 93a <sup>2</sup> 107a <sup>2</sup> 108a <sup>1</sup> }  | 5.13                   |
| ${}^1A'$  | {...89a <sup>2</sup> 102a <sup>2</sup> 90a <sup>2</sup> 103a <sup>2</sup> <b>104a</b> <sup>1</sup> 105a <sup>2</sup> 91a <sup>2</sup> 92a <sup>2</sup> 106a <sup>2</sup> 93a <sup>2</sup> 107a <sup>2</sup> 108a <sup>1</sup> }  | 5.15                   |
| ${}^3A'$  | {...89a <sup>2</sup> 102a <sup>2</sup> 90a <sup>2</sup> <b>103a</b> <sup>1</sup> 104a <sup>2</sup> 105a <sup>2</sup> 91a <sup>2</sup> 92a <sup>2</sup> 106a <sup>2</sup> 93a <sup>2</sup> 107a <sup>2</sup> 108a <sup>1</sup> }  | 5.27                   |
| ${}^1A'$  | {...89a <sup>2</sup> 102a <sup>2</sup> 90a <sup>2</sup> <b>103a</b> <sup>1</sup> 104a <sup>2</sup> 105a <sup>2</sup> 91a <sup>2</sup> 92a <sup>2</sup> 106a <sup>2</sup> 93a <sup>2</sup> 107a <sup>2</sup> 108a <sup>1</sup> }  | 5.29                   |
| ${}^3A''$ | {...89a <sup>2</sup> 102a <sup>2</sup> <b>90a</b> <sup>1</sup> 103a <sup>2</sup> 104a <sup>2</sup> 105a <sup>2</sup> 91a <sup>2</sup> 92a <sup>2</sup> 106a <sup>2</sup> 93a <sup>2</sup> 107a <sup>2</sup> 108a <sup>1</sup> }  | 5.51                   |
| ${}^1A''$ | {...89a <sup>2</sup> 102a <sup>2</sup> <b>90a</b> <sup>1</sup> 103a <sup>2</sup> 104a <sup>2</sup> 105a <sup>2</sup> 91a <sup>2</sup> 92a <sup>2</sup> 106a <sup>2</sup> 93a <sup>2</sup> 107a <sup>2</sup> 108a <sup>1</sup> }  | 5.53                   |
| ${}^3A'$  | {...89a <sup>2</sup> <b>102a</b> <sup>1</sup> 90a <sup>2</sup> 103a <sup>2</sup> 104a <sup>2</sup> 105a <sup>2</sup> 91a <sup>2</sup> 92a <sup>2</sup> 106a <sup>2</sup> 93a <sup>2</sup> 107a <sup>2</sup> 108a <sup>1</sup> }  | 5.76                   |
| ${}^1A'$  | {...89a <sup>2</sup> <b>102a</b> <sup>1</sup> 90a <sup>2</sup> 103a <sup>2</sup> 104a <sup>2</sup> 105a <sup>2</sup> 91a <sup>2</sup> 92a <sup>2</sup> 106a <sup>2</sup> 93a <sup>2</sup> 107a <sup>2</sup> 108a <sup>1</sup> }  | 5.78                   |
| ${}^3A''$ | {... <b>89a</b> <sup>1</sup> 102a <sup>2</sup> 90a <sup>2</sup> 103a <sup>2</sup> 104a <sup>2</sup> 105a <sup>2</sup> 91a <sup>2</sup> 92a <sup>2</sup> 106a <sup>2</sup> 93a <sup>2</sup> 107a <sup>2</sup> 108a <sup>1</sup> } | 6.16                   |
| ${}^1A''$ | {... <b>89a</b> <sup>1</sup> 102a <sup>2</sup> 90a <sup>2</sup> 103a <sup>2</sup> 104a <sup>2</sup> 105a <sup>2</sup> 91a <sup>2</sup> 92a <sup>2</sup> 106a <sup>2</sup> 93a <sup>2</sup> 107a <sup>2</sup> 108a <sup>1</sup> } | 6.18                   |

Table S4. The computed VDEs, electron configurations, and final electronic states using the generalized Koopmans' theorem for the  $B_{80}^-$  ( $C_i, {}^2A$ ) core-shell. The bold-face indicates the orbitals from which an electron is detached.

| State          | Configuration                                                                                                                                                                                                                                          | Theo. VDE <sup>a</sup> |
|----------------|--------------------------------------------------------------------------------------------------------------------------------------------------------------------------------------------------------------------------------------------------------|------------------------|
| <sup>1</sup> A | {...189a <sup>2</sup> 190a <sup>2</sup> 191a <sup>2</sup> 192a <sup>2</sup> 193a <sup>2</sup> 194a <sup>2</sup> 195a <sup>2</sup> 196a <sup>2</sup> 197a <sup>2</sup> 198a <sup>2</sup> 199a <sup>2</sup> 200a <sup>2</sup> <b>201a<sup>0</sup></b> }  | 3.15                   |
| <sup>3</sup> A | {...189a <sup>2</sup> 190a <sup>2</sup> 191a <sup>2</sup> 192a <sup>2</sup> 193a <sup>2</sup> 194a <sup>2</sup> 195a <sup>2</sup> 196a <sup>2</sup> 197a <sup>2</sup> 198a <sup>2</sup> 199a <sup>2</sup> <b>200a<sup>1</sup></b> 201a <sup>1</sup> }  | 3.60                   |
| <sup>1</sup> A | {...189a <sup>2</sup> 190a <sup>2</sup> 191a <sup>2</sup> 192a <sup>2</sup> 193a <sup>2</sup> 194a <sup>2</sup> 195a <sup>2</sup> 196a <sup>2</sup> 197a <sup>2</sup> 198a <sup>2</sup> 199a <sup>2</sup> <b>200a<sup>1</sup></b> 201a <sup>1</sup> }  | 3.62                   |
| <sup>3</sup> A | {...189a <sup>2</sup> 190a <sup>2</sup> 191a <sup>2</sup> 192a <sup>2</sup> 193a <sup>2</sup> 194a <sup>2</sup> 195a <sup>2</sup> 196a <sup>2</sup> 197a <sup>2</sup> 198a <sup>2</sup> <b>199a<sup>1</sup></b> 200a <sup>2</sup> 201a <sup>1</sup> }  | 3.77                   |
| <sup>1</sup> A | {...189a <sup>2</sup> 190a <sup>2</sup> 191a <sup>2</sup> 192a <sup>2</sup> 193a <sup>2</sup> 194a <sup>2</sup> 195a <sup>2</sup> 196a <sup>2</sup> 197a <sup>2</sup> 198a <sup>2</sup> <b>199a<sup>1</sup></b> 200a <sup>2</sup> 201a <sup>1</sup> }  | 3.79                   |
| <sup>3</sup> A | {...189a <sup>2</sup> 190a <sup>2</sup> 191a <sup>2</sup> 192a <sup>2</sup> 193a <sup>2</sup> 194a <sup>2</sup> 195a <sup>2</sup> 196a <sup>2</sup> 197a <sup>2</sup> <b>198a<sup>1</sup></b> 199a <sup>2</sup> 200a <sup>2</sup> 201a <sup>1</sup> }  | 4.05                   |
| <sup>1</sup> A | {...189a <sup>2</sup> 190a <sup>2</sup> 191a <sup>2</sup> 192a <sup>2</sup> 193a <sup>2</sup> 194a <sup>2</sup> 195a <sup>2</sup> 196a <sup>2</sup> 197a <sup>2</sup> <b>198a<sup>1</sup></b> 199a <sup>2</sup> 200a <sup>2</sup> 201a <sup>1</sup> }  | 4.08                   |
| <sup>3</sup> A | {...189a <sup>2</sup> 190a <sup>2</sup> 191a <sup>2</sup> 192a <sup>2</sup> 193a <sup>2</sup> 194a <sup>2</sup> 195a <sup>2</sup> 196a <sup>2</sup> <b>197a<sup>1</sup></b> 198a <sup>2</sup> 199a <sup>2</sup> 200a <sup>2</sup> 201a <sup>1</sup> }  | 4.10                   |
| <sup>1</sup> A | {...189a <sup>2</sup> 190a <sup>2</sup> 191a <sup>2</sup> 192a <sup>2</sup> 193a <sup>2</sup> 194a <sup>2</sup> 195a <sup>2</sup> 196a <sup>2</sup> <b>197a<sup>1</sup></b> 198a <sup>2</sup> 199a <sup>2</sup> 200a <sup>2</sup> 201a <sup>1</sup> }  | 4.12                   |
| <sup>3</sup> A | {...189a <sup>2</sup> 190a <sup>2</sup> 191a <sup>2</sup> 192a <sup>2</sup> 193a <sup>2</sup> 194a <sup>2</sup> 195a <sup>2</sup> <b>196a<sup>1</sup></b> 197a <sup>2</sup> 198a <sup>2</sup> 199a <sup>2</sup> 200a <sup>2</sup> 201a <sup>1</sup> }  | 4.30                   |
| <sup>1</sup> A | {...189a <sup>2</sup> 190a <sup>2</sup> 191a <sup>2</sup> 192a <sup>2</sup> 193a <sup>2</sup> 194a <sup>2</sup> 195a <sup>2</sup> <b>196a<sup>1</sup></b> 197a <sup>2</sup> 198a <sup>2</sup> 199a <sup>2</sup> 200a <sup>2</sup> 201a <sup>1</sup> }  | 4.33                   |
| <sup>3</sup> A | {...189a <sup>2</sup> 190a <sup>2</sup> 191a <sup>2</sup> 192a <sup>2</sup> 193a <sup>2</sup> 194a <sup>2</sup> <b>195a<sup>1</sup></b> 196a <sup>2</sup> 197a <sup>2</sup> 198a <sup>2</sup> 199a <sup>2</sup> 200a <sup>2</sup> 201a <sup>1</sup> }  | 4.66                   |
| <sup>1</sup> A | {...189a <sup>2</sup> 190a <sup>2</sup> 191a <sup>2</sup> 192a <sup>2</sup> 193a <sup>2</sup> 194a <sup>2</sup> <b>195a<sup>1</sup></b> 196a <sup>2</sup> 197a <sup>2</sup> 198a <sup>2</sup> 199a <sup>2</sup> 200a <sup>2</sup> 201a <sup>1</sup> }  | 4.68                   |
| <sup>3</sup> A | {...189a <sup>2</sup> 190a <sup>2</sup> 191a <sup>2</sup> 192a <sup>2</sup> 193a <sup>2</sup> <b>194a<sup>1</sup></b> 195a <sup>2</sup> 196a <sup>2</sup> 197a <sup>2</sup> 198a <sup>2</sup> 199a <sup>2</sup> 200a <sup>2</sup> 201a <sup>1</sup> }  | 4.80                   |
| <sup>1</sup> A | {...189a <sup>2</sup> 190a <sup>2</sup> 191a <sup>2</sup> 192a <sup>2</sup> 193a <sup>2</sup> <b>194a<sup>1</sup></b> 195a <sup>2</sup> 196a <sup>2</sup> 197a <sup>2</sup> 198a <sup>2</sup> 199a <sup>2</sup> 200a <sup>2</sup> 201a <sup>1</sup> }  | 4.82                   |
| <sup>3</sup> A | {...189a <sup>2</sup> 190a <sup>2</sup> 191a <sup>2</sup> 192a <sup>2</sup> <b>193a<sup>1</sup></b> 194a <sup>2</sup> 195a <sup>2</sup> 196a <sup>2</sup> 197a <sup>2</sup> 198a <sup>2</sup> 199a <sup>2</sup> 200a <sup>2</sup> 201a <sup>1</sup> }  | 4.98                   |
| <sup>1</sup> A | {...189a <sup>2</sup> 190a <sup>2</sup> 191a <sup>2</sup> 192a <sup>2</sup> <b>193a<sup>1</sup></b> 194a <sup>2</sup> 195a <sup>2</sup> 196a <sup>2</sup> 197a <sup>2</sup> 198a <sup>2</sup> 199a <sup>2</sup> 200a <sup>2</sup> 201a <sup>1</sup> }  | 5.01                   |
| <sup>3</sup> A | {...189a <sup>2</sup> 190a <sup>2</sup> 191a <sup>2</sup> <b>192a<sup>1</sup></b> 193a <sup>2</sup> 194a <sup>2</sup> 195a <sup>2</sup> 196a <sup>2</sup> 197a <sup>2</sup> 198a <sup>2</sup> 199a <sup>2</sup> 200a <sup>2</sup> 201a <sup>1</sup> }  | 5.31                   |
| <sup>1</sup> A | {...189a <sup>2</sup> 190a <sup>2</sup> 191a <sup>2</sup> <b>192a<sup>1</sup></b> 193a <sup>2</sup> 194a <sup>2</sup> 195a <sup>2</sup> 196a <sup>2</sup> 197a <sup>2</sup> 198a <sup>2</sup> 199a <sup>2</sup> 200a <sup>2</sup> 201a <sup>1</sup> }  | 5.34                   |
| <sup>3</sup> A | {...189a <sup>2</sup> 190a <sup>2</sup> <b>191a<sup>1</sup></b> 192a <sup>2</sup> 193a <sup>2</sup> 194a <sup>2</sup> 195a <sup>2</sup> 196a <sup>2</sup> 197a <sup>2</sup> 198a <sup>2</sup> 199a <sup>2</sup> 200a <sup>2</sup> 201a <sup>1</sup> }  | 5.53                   |
| <sup>1</sup> A | {...189a <sup>2</sup> 190a <sup>2</sup> <b>191a<sup>1</sup></b> 192a <sup>2</sup> 193a <sup>2</sup> 194a <sup>2</sup> 195a <sup>2</sup> 196a <sup>2</sup> 197a <sup>2</sup> 198a <sup>2</sup> 199a <sup>2</sup> 200a <sup>2</sup> 201a <sup>1</sup> }  | 5.56                   |
| <sup>3</sup> A | {...189a <sup>2</sup> <b>190a<sup>1</sup></b> 191a <sup>2</sup> 192a <sup>2</sup> 193a <sup>2</sup> 194a <sup>2</sup> 195a <sup>2</sup> 196a <sup>2</sup> 197a <sup>2</sup> 198a <sup>2</sup> 199a <sup>2</sup> 200a <sup>2</sup> 201a <sup>1</sup> }  | 5.85                   |
| <sup>1</sup> A | {...189a <sup>2</sup> <b>190a<sup>1</sup></b> 191a <sup>2</sup> 192a <sup>2</sup> 193a <sup>2</sup> 194a <sup>2</sup> 195a <sup>2</sup> 196a <sup>2</sup> 197a <sup>2</sup> 198a <sup>2</sup> 199a <sup>2</sup> 200a <sup>2</sup> 201a <sup>1</sup> }  | 5.87                   |
| <sup>3</sup> A | {... <b>189a<sup>1</sup></b> 190a <sup>2</sup> 191a <sup>2</sup> 192a <sup>2</sup> 193a <sup>2</sup> 194a <sup>2</sup> 195a <sup>2</sup> 196a <sup>2</sup> 197a <sup>2</sup> 198a <sup>2</sup> 199a <sup>2</sup> 200a <sup>2</sup> 201a <sup>1</sup> } | 6.01                   |
| <sup>1</sup> A | {... <b>189a<sup>1</sup></b> 190a <sup>2</sup> 191a <sup>2</sup> 192a <sup>2</sup> 193a <sup>2</sup> 194a <sup>2</sup> 195a <sup>2</sup> 196a <sup>2</sup> 197a <sup>2</sup> 198a <sup>2</sup> 199a <sup>2</sup> 200a <sup>2</sup> 201a <sup>1</sup> } | 6.03                   |

Table S5. The computed VDEs, electron configurations, and final electronic states using the generalized Koopmans' theorem for the  $B_{80}^-$  ( $C_s, {}^2A''$ ) sphere. The bold-face indicates the orbitals from which an electron is detached.

| State     | Configuration                                                                                                                                                                                                                                          | Theo. VDE <sup>a</sup> |
|-----------|--------------------------------------------------------------------------------------------------------------------------------------------------------------------------------------------------------------------------------------------------------|------------------------|
| ${}^1A''$ | {...106a <sup>2</sup> 107a <sup>2</sup> 84a <sup>n2</sup> 108a <sup>2</sup> 109a <sup>2</sup> 85a <sup>n2</sup> 86a <sup>n2</sup> 110a <sup>2</sup> 87a <sup>n2</sup> 111a <sup>2</sup> 88a <sup>n2</sup> 112a <sup>2</sup> <b>89a<sup>n0</sup></b> }  | 2.85                   |
| ${}^3A''$ | {...106a <sup>2</sup> 107a <sup>2</sup> 84a <sup>n2</sup> 108a <sup>2</sup> 109a <sup>2</sup> 85a <sup>n2</sup> 86a <sup>n2</sup> 110a <sup>2</sup> 87a <sup>n2</sup> 111a <sup>2</sup> 88a <sup>n2</sup> <b>112a<sup>1</sup>89a<sup>n1</sup></b> }    | 3.77                   |
| ${}^1A''$ | {...106a <sup>2</sup> 107a <sup>2</sup> 84a <sup>n2</sup> 108a <sup>2</sup> 109a <sup>2</sup> 85a <sup>n2</sup> 86a <sup>n2</sup> 110a <sup>2</sup> 87a <sup>n2</sup> 111a <sup>2</sup> 88a <sup>n2</sup> <b>112a<sup>1</sup>89a<sup>n1</sup></b> }    | 3.79                   |
| ${}^3A'$  | {...106a <sup>2</sup> 107a <sup>2</sup> 84a <sup>n2</sup> 108a <sup>2</sup> 109a <sup>2</sup> 85a <sup>n2</sup> 86a <sup>n2</sup> 110a <sup>2</sup> 87a <sup>n2</sup> 111a <sup>2</sup> <b>88a<sup>n1</sup></b> 112a <sup>2</sup> 89a <sup>n1</sup> }  | 3.97                   |
| ${}^1A'$  | {...106a <sup>2</sup> 107a <sup>2</sup> 84a <sup>n2</sup> 108a <sup>2</sup> 109a <sup>2</sup> 85a <sup>n2</sup> 86a <sup>n2</sup> 110a <sup>2</sup> 87a <sup>n2</sup> 111a <sup>2</sup> <b>88a<sup>n1</sup></b> 112a <sup>2</sup> 89a <sup>n1</sup> }  | 3.99                   |
| ${}^3A''$ | {...106a <sup>2</sup> 107a <sup>2</sup> 84a <sup>n2</sup> 108a <sup>2</sup> 109a <sup>2</sup> 85a <sup>n2</sup> 86a <sup>n2</sup> 110a <sup>2</sup> 87a <sup>n2</sup> <b>111a<sup>1</sup></b> 88a <sup>n2</sup> 112a <sup>2</sup> 89a <sup>n1</sup> }  | 4.14                   |
| ${}^1A''$ | {...106a <sup>2</sup> 107a <sup>2</sup> 84a <sup>n2</sup> 108a <sup>2</sup> 109a <sup>2</sup> 85a <sup>n2</sup> 86a <sup>n2</sup> 110a <sup>2</sup> 87a <sup>n2</sup> <b>111a<sup>1</sup></b> 88a <sup>n2</sup> 112a <sup>2</sup> 89a <sup>n1</sup> }  | 4.16                   |
| ${}^3A'$  | {...106a <sup>2</sup> 107a <sup>2</sup> 84a <sup>n2</sup> 108a <sup>2</sup> 109a <sup>2</sup> 85a <sup>n2</sup> 86a <sup>n2</sup> 110a <sup>2</sup> <b>87a<sup>n1</sup></b> 111a <sup>2</sup> 88a <sup>n2</sup> 112a <sup>2</sup> 89a <sup>n1</sup> }  | 4.34                   |
| ${}^1A'$  | {...106a <sup>2</sup> 107a <sup>2</sup> 84a <sup>n2</sup> 108a <sup>2</sup> 109a <sup>2</sup> 85a <sup>n2</sup> 86a <sup>n2</sup> 110a <sup>2</sup> <b>87a<sup>n1</sup></b> 111a <sup>2</sup> 88a <sup>n2</sup> 112a <sup>2</sup> 89a <sup>n1</sup> }  | 4.36                   |
| ${}^3A''$ | {...106a <sup>2</sup> 107a <sup>2</sup> 84a <sup>n2</sup> 108a <sup>2</sup> 109a <sup>2</sup> 85a <sup>n2</sup> 86a <sup>n2</sup> <b>110a<sup>1</sup></b> 87a <sup>n2</sup> 111a <sup>2</sup> 88a <sup>n2</sup> 112a <sup>2</sup> 89a <sup>n1</sup> }  | 4.60                   |
| ${}^1A''$ | {...106a <sup>2</sup> 107a <sup>2</sup> 84a <sup>n2</sup> 108a <sup>2</sup> 109a <sup>2</sup> 85a <sup>n2</sup> 86a <sup>n2</sup> <b>110a<sup>1</sup></b> 87a <sup>n2</sup> 111a <sup>2</sup> 88a <sup>n2</sup> 112a <sup>2</sup> 89a <sup>n1</sup> }  | 4.62                   |
| ${}^3A'$  | {...106a <sup>2</sup> 107a <sup>2</sup> 84a <sup>n2</sup> 108a <sup>2</sup> 109a <sup>2</sup> 85a <sup>n2</sup> <b>86a<sup>n1</sup></b> 110a <sup>2</sup> 87a <sup>n2</sup> 111a <sup>2</sup> 88a <sup>n2</sup> 112a <sup>2</sup> 89a <sup>n1</sup> }  | 4.88                   |
| ${}^1A'$  | {...106a <sup>2</sup> 107a <sup>2</sup> 84a <sup>n2</sup> 108a <sup>2</sup> 109a <sup>2</sup> 85a <sup>n2</sup> <b>86a<sup>n1</sup></b> 110a <sup>2</sup> 87a <sup>n2</sup> 111a <sup>2</sup> 88a <sup>n2</sup> 112a <sup>2</sup> 89a <sup>n1</sup> }  | 4.91                   |
| ${}^3A'$  | {...106a <sup>2</sup> 107a <sup>2</sup> 84a <sup>n2</sup> 108a <sup>2</sup> 109a <sup>2</sup> <b>85a<sup>n1</sup></b> 86a <sup>n2</sup> 110a <sup>2</sup> 87a <sup>n2</sup> 111a <sup>2</sup> 88a <sup>n2</sup> 112a <sup>2</sup> 89a <sup>n1</sup> }  | 5.13                   |
| ${}^1A'$  | {...106a <sup>2</sup> 107a <sup>2</sup> 84a <sup>n2</sup> 108a <sup>2</sup> 109a <sup>2</sup> <b>85a<sup>n1</sup></b> 86a <sup>n2</sup> 110a <sup>2</sup> 87a <sup>n2</sup> 111a <sup>2</sup> 88a <sup>n2</sup> 112a <sup>2</sup> 89a <sup>n1</sup> }  | 5.16                   |
| ${}^3A''$ | {...106a <sup>2</sup> 107a <sup>2</sup> 84a <sup>n2</sup> 108a <sup>2</sup> <b>109a<sup>1</sup></b> 85a <sup>n2</sup> 86a <sup>n2</sup> 110a <sup>2</sup> 87a <sup>n2</sup> 111a <sup>2</sup> 88a <sup>n2</sup> 112a <sup>2</sup> 89a <sup>n1</sup> }  | 5.45                   |
| ${}^1A''$ | {...106a <sup>2</sup> 107a <sup>2</sup> 84a <sup>n2</sup> 108a <sup>2</sup> <b>109a<sup>1</sup></b> 85a <sup>n2</sup> 86a <sup>n2</sup> 110a <sup>2</sup> 87a <sup>n2</sup> 111a <sup>2</sup> 88a <sup>n2</sup> 112a <sup>2</sup> 89a <sup>n1</sup> }  | 5.47                   |
| ${}^3A''$ | {...106a <sup>2</sup> 107a <sup>2</sup> 84a <sup>n2</sup> <b>108a<sup>1</sup></b> 109a <sup>2</sup> 85a <sup>n2</sup> 86a <sup>n2</sup> 110a <sup>2</sup> 87a <sup>n2</sup> 111a <sup>2</sup> 88a <sup>n2</sup> 112a <sup>2</sup> 89a <sup>n1</sup> }  | 5.64                   |
| ${}^1A''$ | {...106a <sup>2</sup> 107a <sup>2</sup> 84a <sup>n2</sup> <b>108a<sup>1</sup></b> 109a <sup>2</sup> 85a <sup>n2</sup> 86a <sup>n2</sup> 110a <sup>2</sup> 87a <sup>n2</sup> 111a <sup>2</sup> 88a <sup>n2</sup> 112a <sup>2</sup> 89a <sup>n1</sup> }  | 5.66                   |
| ${}^3A'$  | {...106a <sup>2</sup> 107a <sup>2</sup> <b>84a<sup>n1</sup></b> 108a <sup>2</sup> 109a <sup>2</sup> 85a <sup>n2</sup> 86a <sup>n2</sup> 110a <sup>2</sup> 87a <sup>n2</sup> 111a <sup>2</sup> 88a <sup>n2</sup> 112a <sup>2</sup> 89a <sup>n1</sup> }  | 6.03                   |
| ${}^1A'$  | {...106a <sup>2</sup> 107a <sup>2</sup> <b>84a<sup>n1</sup></b> 108a <sup>2</sup> 109a <sup>2</sup> 85a <sup>n2</sup> 86a <sup>n2</sup> 110a <sup>2</sup> 87a <sup>n2</sup> 111a <sup>2</sup> 88a <sup>n2</sup> 112a <sup>2</sup> 89a <sup>n1</sup> }  | 6.05                   |
| ${}^3A''$ | {...106a <sup>2</sup> <b>107a<sup>1</sup></b> 84a <sup>n2</sup> 108a <sup>2</sup> 109a <sup>2</sup> 85a <sup>n2</sup> 86a <sup>n2</sup> 110a <sup>2</sup> 87a <sup>n2</sup> 111a <sup>2</sup> 88a <sup>n2</sup> 112a <sup>2</sup> 89a <sup>n1</sup> }  | 6.16                   |
| ${}^1A''$ | {...106a <sup>2</sup> <b>107a<sup>1</sup></b> 84a <sup>n2</sup> 108a <sup>2</sup> 109a <sup>2</sup> 85a <sup>n2</sup> 86a <sup>n2</sup> 110a <sup>2</sup> 87a <sup>n2</sup> 111a <sup>2</sup> 88a <sup>n2</sup> 112a <sup>2</sup> 89a <sup>n1</sup> }  | 6.18                   |
| ${}^3A''$ | {... <b>106a<sup>1</sup></b> 107a <sup>2</sup> 84a <sup>n2</sup> 108a <sup>2</sup> 109a <sup>2</sup> 85a <sup>n2</sup> 86a <sup>n2</sup> 110a <sup>2</sup> 87a <sup>n2</sup> 111a <sup>2</sup> 88a <sup>n2</sup> 112a <sup>2</sup> 89a <sup>n1</sup> } | 6.31                   |
| ${}^1A''$ | {... <b>106a<sup>1</sup></b> 107a <sup>2</sup> 84a <sup>n2</sup> 108a <sup>2</sup> 109a <sup>2</sup> 85a <sup>n2</sup> 86a <sup>n2</sup> 110a <sup>2</sup> 87a <sup>n2</sup> 111a <sup>2</sup> 88a <sup>n2</sup> 112a <sup>2</sup> 89a <sup>n1</sup> } | 6.33                   |

Table S6. The computed VDEs, electron configurations, and final electronic states using the generalized Koopmans' theorem for the  $B_{80}^-$  ( $D_{2h}$ ,  ${}^2B_{2u}$ ) volleyball. The bold-face indicates the orbitals from which an electron is detached.

| State        | Configuration                                                                                                                                                                                                                                                                                                                                                                                                              | Theo. VDE <sup>a</sup> |
|--------------|----------------------------------------------------------------------------------------------------------------------------------------------------------------------------------------------------------------------------------------------------------------------------------------------------------------------------------------------------------------------------------------------------------------------------|------------------------|
| ${}^1B_{2u}$ | {...26b <sub>1u</sub> <sup>2</sup> 22b <sub>3g</sub> <sup>2</sup> 22b <sub>1g</sub> <sup>2</sup> 22b <sub>2g</sub> <sup>2</sup> 32a <sub>g</sub> <sup>2</sup> 33a <sub>g</sub> <sup>2</sup> 34a <sub>g</sub> <sup>2</sup> 27b <sub>1u</sub> <sup>2</sup> 27b <sub>3u</sub> <sup>2</sup> 27b <sub>2u</sub> <sup>2</sup> 18a <sub>u</sub> <sup>2</sup> 19a <sub>u</sub> <sup>2</sup> <b>28b<sub>2u</sub><sup>0</sup></b> }   | 3.48                   |
| ${}^3B_{2g}$ | {...26b <sub>1u</sub> <sup>2</sup> 22b <sub>3g</sub> <sup>2</sup> 22b <sub>1g</sub> <sup>2</sup> 22b <sub>2g</sub> <sup>2</sup> 32a <sub>g</sub> <sup>2</sup> 33a <sub>g</sub> <sup>2</sup> 34a <sub>g</sub> <sup>2</sup> 27b <sub>1u</sub> <sup>2</sup> 27b <sub>3u</sub> <sup>2</sup> 27b <sub>2u</sub> <sup>2</sup> 18a <sub>u</sub> <sup>2</sup> <b>19a<sub>u</sub><sup>1</sup>28b<sub>2u</sub><sup>1</sup></b> }      | 3.51                   |
| ${}^1B_{2g}$ | {...26b <sub>1u</sub> <sup>2</sup> 22b <sub>3g</sub> <sup>2</sup> 22b <sub>1g</sub> <sup>2</sup> 22b <sub>2g</sub> <sup>2</sup> 32a <sub>g</sub> <sup>2</sup> 33a <sub>g</sub> <sup>2</sup> 34a <sub>g</sub> <sup>2</sup> 27b <sub>1u</sub> <sup>2</sup> 27b <sub>3u</sub> <sup>2</sup> 27b <sub>2u</sub> <sup>2</sup> 18a <sub>u</sub> <sup>2</sup> <b>19a<sub>u</sub><sup>1</sup>28b<sub>2u</sub><sup>1</sup></b> }      | 3.53                   |
| ${}^3B_{2g}$ | {...26b <sub>1u</sub> <sup>2</sup> 22b <sub>3g</sub> <sup>2</sup> 22b <sub>1g</sub> <sup>2</sup> 22b <sub>2g</sub> <sup>2</sup> 32a <sub>g</sub> <sup>2</sup> 33a <sub>g</sub> <sup>2</sup> 34a <sub>g</sub> <sup>2</sup> 27b <sub>1u</sub> <sup>2</sup> 27b <sub>3u</sub> <sup>2</sup> 27b <sub>2u</sub> <sup>2</sup> <b>18a<sub>u</sub><sup>1</sup>19a<sub>u</sub><sup>2</sup>28b<sub>2u</sub><sup>1</sup></b> }         | 3.97                   |
| ${}^1B_{2g}$ | {...26b <sub>1u</sub> <sup>2</sup> 22b <sub>3g</sub> <sup>2</sup> 22b <sub>1g</sub> <sup>2</sup> 22b <sub>2g</sub> <sup>2</sup> 32a <sub>g</sub> <sup>2</sup> 33a <sub>g</sub> <sup>2</sup> 34a <sub>g</sub> <sup>2</sup> 27b <sub>1u</sub> <sup>2</sup> 27b <sub>3u</sub> <sup>2</sup> 27b <sub>2u</sub> <sup>2</sup> <b>18a<sub>u</sub><sup>1</sup>19a<sub>u</sub><sup>2</sup>28b<sub>2u</sub><sup>1</sup></b> }         | 3.99                   |
| ${}^3A_g$    | {...26b <sub>1u</sub> <sup>2</sup> 22b <sub>3g</sub> <sup>2</sup> 22b <sub>1g</sub> <sup>2</sup> 22b <sub>2g</sub> <sup>2</sup> 32a <sub>g</sub> <sup>2</sup> 33a <sub>g</sub> <sup>2</sup> 34a <sub>g</sub> <sup>2</sup> 27b <sub>1u</sub> <sup>2</sup> 27b <sub>3u</sub> <sup>2</sup> <b>27b<sub>2u</sub><sup>1</sup></b> 18a <sub>u</sub> <sup>2</sup> 19a <sub>u</sub> <sup>2</sup> 28b <sub>2u</sub> <sup>1</sup> }   | 4.12                   |
| ${}^1A_g$    | {...26b <sub>1u</sub> <sup>2</sup> 22b <sub>3g</sub> <sup>2</sup> 22b <sub>1g</sub> <sup>2</sup> 22b <sub>2g</sub> <sup>2</sup> 32a <sub>g</sub> <sup>2</sup> 33a <sub>g</sub> <sup>2</sup> 34a <sub>g</sub> <sup>2</sup> 27b <sub>1u</sub> <sup>2</sup> 27b <sub>3u</sub> <sup>2</sup> <b>27b<sub>2u</sub><sup>1</sup></b> 18a <sub>u</sub> <sup>2</sup> 19a <sub>u</sub> <sup>2</sup> 28b <sub>2u</sub> <sup>1</sup> }   | 4.14                   |
| ${}^3B_{1g}$ | {...26b <sub>1u</sub> <sup>2</sup> 22b <sub>3g</sub> <sup>2</sup> 22b <sub>1g</sub> <sup>2</sup> 22b <sub>2g</sub> <sup>2</sup> 32a <sub>g</sub> <sup>2</sup> 33a <sub>g</sub> <sup>2</sup> 34a <sub>g</sub> <sup>2</sup> 27b <sub>1u</sub> <sup>2</sup> <b>27b<sub>3u</sub><sup>1</sup></b> 127b <sub>2u</sub> <sup>2</sup> 18a <sub>u</sub> <sup>2</sup> 19a <sub>u</sub> <sup>2</sup> 28b <sub>2u</sub> <sup>1</sup> }  | 4.39                   |
| ${}^1B_{1g}$ | {...26b <sub>1u</sub> <sup>2</sup> 22b <sub>3g</sub> <sup>2</sup> 22b <sub>1g</sub> <sup>2</sup> 22b <sub>2g</sub> <sup>2</sup> 32a <sub>g</sub> <sup>2</sup> 33a <sub>g</sub> <sup>2</sup> 34a <sub>g</sub> <sup>2</sup> 27b <sub>1u</sub> <sup>2</sup> <b>27b<sub>3u</sub><sup>1</sup></b> 127b <sub>2u</sub> <sup>2</sup> 18a <sub>u</sub> <sup>2</sup> 19a <sub>u</sub> <sup>2</sup> 28b <sub>2u</sub> <sup>1</sup> }  | 4.42                   |
| ${}^3B_{3g}$ | {...26b <sub>1u</sub> <sup>2</sup> 22b <sub>3g</sub> <sup>2</sup> 22b <sub>1g</sub> <sup>2</sup> 22b <sub>2g</sub> <sup>2</sup> 32a <sub>g</sub> <sup>2</sup> 33a <sub>g</sub> <sup>2</sup> 34a <sub>g</sub> <sup>2</sup> <b>27b<sub>1u</sub><sup>1</sup></b> 127b <sub>3u</sub> <sup>2</sup> 27b <sub>2u</sub> <sup>2</sup> 18a <sub>u</sub> <sup>2</sup> 19a <sub>u</sub> <sup>2</sup> 28b <sub>2u</sub> <sup>1</sup> }  | 4.53                   |
| ${}^1B_{3g}$ | {...26b <sub>1u</sub> <sup>2</sup> 22b <sub>3g</sub> <sup>2</sup> 22b <sub>1g</sub> <sup>2</sup> 22b <sub>2g</sub> <sup>2</sup> 32a <sub>g</sub> <sup>2</sup> 33a <sub>g</sub> <sup>2</sup> 34a <sub>g</sub> <sup>2</sup> <b>27b<sub>1u</sub><sup>1</sup></b> 127b <sub>3u</sub> <sup>2</sup> 27b <sub>2u</sub> <sup>2</sup> 18a <sub>u</sub> <sup>2</sup> 19a <sub>u</sub> <sup>2</sup> 28b <sub>2u</sub> <sup>1</sup> }  | 4.55                   |
| ${}^3B_{2u}$ | {...26b <sub>1u</sub> <sup>2</sup> 22b <sub>3g</sub> <sup>2</sup> 22b <sub>1g</sub> <sup>2</sup> 22b <sub>2g</sub> <sup>2</sup> 32a <sub>g</sub> <sup>2</sup> 33a <sub>g</sub> <sup>2</sup> <b>34a<sub>g</sub><sup>1</sup></b> 127b <sub>1u</sub> <sup>2</sup> 27b <sub>3u</sub> <sup>2</sup> 27b <sub>2u</sub> <sup>2</sup> 18a <sub>u</sub> <sup>2</sup> 19a <sub>u</sub> <sup>2</sup> 28b <sub>2u</sub> <sup>1</sup> }  | 4.75                   |
| ${}^1B_{2u}$ | {...26b <sub>1u</sub> <sup>2</sup> 22b <sub>3g</sub> <sup>2</sup> 22b <sub>1g</sub> <sup>2</sup> 22b <sub>2g</sub> <sup>2</sup> 32a <sub>g</sub> <sup>2</sup> 33a <sub>g</sub> <sup>2</sup> <b>34a<sub>g</sub><sup>1</sup></b> 127b <sub>1u</sub> <sup>2</sup> 27b <sub>3u</sub> <sup>2</sup> 27b <sub>2u</sub> <sup>2</sup> 18a <sub>u</sub> <sup>2</sup> 19a <sub>u</sub> <sup>2</sup> 28b <sub>2u</sub> <sup>1</sup> }  | 4.77                   |
| ${}^3B_{2u}$ | {...26b <sub>1u</sub> <sup>2</sup> 22b <sub>3g</sub> <sup>2</sup> 22b <sub>1g</sub> <sup>2</sup> 22b <sub>2g</sub> <sup>2</sup> 32a <sub>g</sub> <sup>2</sup> <b>33a<sub>g</sub><sup>1</sup></b> 34a <sub>g</sub> <sup>2</sup> 27b <sub>1u</sub> <sup>2</sup> 27b <sub>3u</sub> <sup>2</sup> 27b <sub>2u</sub> <sup>2</sup> 18a <sub>u</sub> <sup>2</sup> 19a <sub>u</sub> <sup>2</sup> 28b <sub>2u</sub> <sup>1</sup> }   | 5.07                   |
| ${}^1B_{2u}$ | {...26b <sub>1u</sub> <sup>2</sup> 22b <sub>3g</sub> <sup>2</sup> 22b <sub>1g</sub> <sup>2</sup> 22b <sub>2g</sub> <sup>2</sup> 32a <sub>g</sub> <sup>2</sup> <b>33a<sub>g</sub><sup>1</sup></b> 34a <sub>g</sub> <sup>2</sup> 27b <sub>1u</sub> <sup>2</sup> 27b <sub>3u</sub> <sup>2</sup> 27b <sub>2u</sub> <sup>2</sup> 18a <sub>u</sub> <sup>2</sup> 19a <sub>u</sub> <sup>2</sup> 28b <sub>2u</sub> <sup>1</sup> }   | 5.09                   |
| ${}^3B_{2u}$ | {...26b <sub>1u</sub> <sup>2</sup> 22b <sub>3g</sub> <sup>2</sup> 22b <sub>1g</sub> <sup>2</sup> 22b <sub>2g</sub> <sup>2</sup> <b>32a<sub>g</sub><sup>1</sup></b> 33a <sub>g</sub> <sup>2</sup> 34a <sub>g</sub> <sup>2</sup> 27b <sub>1u</sub> <sup>2</sup> 27b <sub>3u</sub> <sup>2</sup> 27b <sub>2u</sub> <sup>2</sup> 18a <sub>u</sub> <sup>2</sup> 19a <sub>u</sub> <sup>2</sup> 28b <sub>2u</sub> <sup>1</sup> }   | 5.17                   |
| ${}^1B_{2u}$ | {...26b <sub>1u</sub> <sup>2</sup> 22b <sub>3g</sub> <sup>2</sup> 22b <sub>1g</sub> <sup>2</sup> 22b <sub>2g</sub> <sup>2</sup> <b>32a<sub>g</sub><sup>1</sup></b> 33a <sub>g</sub> <sup>2</sup> 34a <sub>g</sub> <sup>2</sup> 27b <sub>1u</sub> <sup>2</sup> 27b <sub>3u</sub> <sup>2</sup> 27b <sub>2u</sub> <sup>2</sup> 18a <sub>u</sub> <sup>2</sup> 19a <sub>u</sub> <sup>2</sup> 28b <sub>2u</sub> <sup>1</sup> }   | 5.19                   |
| ${}^3A_u$    | {...26b <sub>1u</sub> <sup>2</sup> 22b <sub>3g</sub> <sup>2</sup> 22b <sub>1g</sub> <sup>2</sup> <b>22b<sub>2g</sub><sup>1</sup></b> 32a <sub>g</sub> <sup>2</sup> 33a <sub>g</sub> <sup>2</sup> 34a <sub>g</sub> <sup>2</sup> 27b <sub>1u</sub> <sup>2</sup> 27b <sub>3u</sub> <sup>2</sup> 27b <sub>2u</sub> <sup>2</sup> 18a <sub>u</sub> <sup>2</sup> 19a <sub>u</sub> <sup>2</sup> 28b <sub>2u</sub> <sup>1</sup> }   | 5.55                   |
| ${}^1A_u$    | {...26b <sub>1u</sub> <sup>2</sup> 22b <sub>3g</sub> <sup>2</sup> 22b <sub>1g</sub> <sup>2</sup> <b>22b<sub>2g</sub><sup>1</sup></b> 32a <sub>g</sub> <sup>2</sup> 33a <sub>g</sub> <sup>2</sup> 34a <sub>g</sub> <sup>2</sup> 27b <sub>1u</sub> <sup>2</sup> 27b <sub>3u</sub> <sup>2</sup> 27b <sub>2u</sub> <sup>2</sup> 18a <sub>u</sub> <sup>2</sup> 19a <sub>u</sub> <sup>2</sup> 28b <sub>2u</sub> <sup>1</sup> }   | 5.57                   |
| ${}^3B_{3u}$ | {...26b <sub>1u</sub> <sup>2</sup> 22b <sub>3g</sub> <sup>2</sup> <b>22b<sub>1g</sub><sup>1</sup></b> 122b <sub>2g</sub> <sup>2</sup> 32a <sub>g</sub> <sup>2</sup> 33a <sub>g</sub> <sup>2</sup> 34a <sub>g</sub> <sup>2</sup> 27b <sub>1u</sub> <sup>2</sup> 27b <sub>3u</sub> <sup>2</sup> 27b <sub>2u</sub> <sup>2</sup> 18a <sub>u</sub> <sup>2</sup> 19a <sub>u</sub> <sup>2</sup> 28b <sub>2u</sub> <sup>1</sup> }  | 5.66                   |
| ${}^1B_{3u}$ | {...26b <sub>1u</sub> <sup>2</sup> 22b <sub>3g</sub> <sup>2</sup> <b>22b<sub>1g</sub><sup>1</sup></b> 122b <sub>2g</sub> <sup>2</sup> 32a <sub>g</sub> <sup>2</sup> 33a <sub>g</sub> <sup>2</sup> 34a <sub>g</sub> <sup>2</sup> 27b <sub>1u</sub> <sup>2</sup> 27b <sub>3u</sub> <sup>2</sup> 27b <sub>2u</sub> <sup>2</sup> 18a <sub>u</sub> <sup>2</sup> 19a <sub>u</sub> <sup>2</sup> 28b <sub>2u</sub> <sup>1</sup> }  | 5.68                   |
| ${}^3B_{1u}$ | {...26b <sub>1u</sub> <sup>2</sup> <b>22b<sub>3g</sub><sup>1</sup></b> 122b <sub>1g</sub> <sup>2</sup> 22b <sub>2g</sub> <sup>2</sup> 32a <sub>g</sub> <sup>2</sup> 33a <sub>g</sub> <sup>2</sup> 34a <sub>g</sub> <sup>2</sup> 27b <sub>1u</sub> <sup>2</sup> 27b <sub>3u</sub> <sup>2</sup> 27b <sub>2u</sub> <sup>2</sup> 18a <sub>u</sub> <sup>2</sup> 19a <sub>u</sub> <sup>2</sup> 28b <sub>2u</sub> <sup>1</sup> }  | 5.81                   |
| ${}^1B_{1u}$ | {...26b <sub>1u</sub> <sup>2</sup> <b>22b<sub>3g</sub><sup>1</sup></b> 122b <sub>1g</sub> <sup>2</sup> 22b <sub>2g</sub> <sup>2</sup> 32a <sub>g</sub> <sup>2</sup> 33a <sub>g</sub> <sup>2</sup> 34a <sub>g</sub> <sup>2</sup> 27b <sub>1u</sub> <sup>2</sup> 27b <sub>3u</sub> <sup>2</sup> 27b <sub>2u</sub> <sup>2</sup> 18a <sub>u</sub> <sup>2</sup> 19a <sub>u</sub> <sup>2</sup> 28b <sub>2u</sub> <sup>1</sup> }  | 5.83                   |
| ${}^3B_{3g}$ | {... <b>26b<sub>1u</sub><sup>1</sup></b> 122b <sub>3g</sub> <sup>2</sup> 22b <sub>1g</sub> <sup>2</sup> 22b <sub>2g</sub> <sup>2</sup> 32a <sub>g</sub> <sup>2</sup> 33a <sub>g</sub> <sup>2</sup> 34a <sub>g</sub> <sup>2</sup> 27b <sub>1u</sub> <sup>2</sup> 27b <sub>3u</sub> <sup>2</sup> 27b <sub>2u</sub> <sup>2</sup> 18a <sub>u</sub> <sup>2</sup> 19a <sub>u</sub> <sup>2</sup> 28b <sub>2u</sub> <sup>1</sup> } | 5.90                   |
| ${}^1B_{3g}$ | {... <b>26b<sub>1u</sub><sup>1</sup></b> 122b <sub>3g</sub> <sup>2</sup> 22b <sub>1g</sub> <sup>2</sup> 22b <sub>2g</sub> <sup>2</sup> 32a <sub>g</sub> <sup>2</sup> 33a <sub>g</sub> <sup>2</sup> 34a <sub>g</sub> <sup>2</sup> 27b <sub>1u</sub> <sup>2</sup> 27b <sub>3u</sub> <sup>2</sup> 27b <sub>2u</sub> <sup>2</sup> 18a <sub>u</sub> <sup>2</sup> 19a <sub>u</sub> <sup>2</sup> 28b <sub>2u</sub> <sup>1</sup> } | 5.92                   |

Table S7. The computed VDEs, electron configurations, and final electronic states using the generalized Koopmans' theorem for the  $B_{80}^- (D_{3d}, {}^2A_{1u})$  sphere, in comparison with the experimental results. The bold-face indicates the orbitals from which an electron is detached.

| State        | Configuration                                                                                                                                                                                                                                                                                                                                                                                                          | Theo. VDE <sup>a</sup> |
|--------------|------------------------------------------------------------------------------------------------------------------------------------------------------------------------------------------------------------------------------------------------------------------------------------------------------------------------------------------------------------------------------------------------------------------------|------------------------|
| ${}^1A_{1u}$ | {...22a <sub>1g</sub> <sup>2</sup> 31e <sub>u</sub> <sup>4</sup> 21a <sub>2u</sub> <sup>2</sup> 31e <sub>g</sub> <sup>4</sup> 12a <sub>1u</sub> <sup>2</sup> 11a <sub>2g</sub> <sup>2</sup> 32e <sub>g</sub> <sup>4</sup> 33e <sub>g</sub> <sup>4</sup> 32e <sub>u</sub> <sup>4</sup> 22a <sub>2u</sub> <sup>2</sup> 23a <sub>1g</sub> <sup>2</sup> 33e <sub>u</sub> <sup>4</sup> <b>3a<sub>1u</sub><sup>0</sup></b> } | 3.28                   |
| ${}^3E_g$    | {...22a <sub>1g</sub> <sup>2</sup> 31e <sub>u</sub> <sup>4</sup> 21a <sub>2u</sub> <sup>2</sup> 31e <sub>g</sub> <sup>4</sup> 12a <sub>1u</sub> <sup>2</sup> 11a <sub>2g</sub> <sup>2</sup> 32e <sub>g</sub> <sup>4</sup> 33e <sub>g</sub> <sup>4</sup> 32e <sub>u</sub> <sup>4</sup> 22a <sub>2u</sub> <sup>2</sup> 23a <sub>1g</sub> <sup>2</sup> <b>33e<sub>u</sub><sup>3</sup>3a<sub>1u</sub><sup>1</sup></b> }    | 3.52                   |
| ${}^1E_g$    | {...22a <sub>1g</sub> <sup>2</sup> 31e <sub>u</sub> <sup>4</sup> 21a <sub>2u</sub> <sup>2</sup> 31e <sub>g</sub> <sup>4</sup> 12a <sub>1u</sub> <sup>2</sup> 11a <sub>2g</sub> <sup>2</sup> 32e <sub>g</sub> <sup>4</sup> 33e <sub>g</sub> <sup>4</sup> 32e <sub>u</sub> <sup>4</sup> 22a <sub>2u</sub> <sup>2</sup> 23a <sub>1g</sub> <sup>2</sup> <b>33e<sub>u</sub><sup>3</sup>3a<sub>1u</sub><sup>1</sup></b> }    | 3.54                   |
| ${}^3A_{1u}$ | {...22a <sub>1g</sub> <sup>2</sup> 31e <sub>u</sub> <sup>4</sup> 21a <sub>2u</sub> <sup>2</sup> 31e <sub>g</sub> <sup>4</sup> 12a <sub>1u</sub> <sup>2</sup> 11a <sub>2g</sub> <sup>2</sup> 32e <sub>g</sub> <sup>4</sup> 33e <sub>g</sub> <sup>4</sup> 32e <sub>u</sub> <sup>4</sup> 22a <sub>2u</sub> <sup>2</sup> <b>23a<sub>1g</sub><sup>1</sup>33e<sub>u</sub><sup>4</sup>3a<sub>1u</sub><sup>1</sup></b> }       | 3.96                   |
| ${}^1A_{1u}$ | {...22a <sub>1g</sub> <sup>2</sup> 31e <sub>u</sub> <sup>4</sup> 21a <sub>2u</sub> <sup>2</sup> 31e <sub>g</sub> <sup>4</sup> 12a <sub>1u</sub> <sup>2</sup> 11a <sub>2g</sub> <sup>2</sup> 32e <sub>g</sub> <sup>4</sup> 33e <sub>g</sub> <sup>4</sup> 32e <sub>u</sub> <sup>4</sup> 22a <sub>2u</sub> <sup>2</sup> <b>23a<sub>1g</sub><sup>1</sup>33e<sub>u</sub><sup>4</sup>3a<sub>1u</sub><sup>1</sup></b> }       | 3.98                   |
| ${}^3A_{2g}$ | {...22a <sub>1g</sub> <sup>2</sup> 31e <sub>u</sub> <sup>4</sup> 21a <sub>2u</sub> <sup>2</sup> 31e <sub>g</sub> <sup>4</sup> 12a <sub>1u</sub> <sup>2</sup> 11a <sub>2g</sub> <sup>2</sup> 32e <sub>g</sub> <sup>4</sup> 33e <sub>g</sub> <sup>4</sup> 32e <sub>u</sub> <sup>4</sup> <b>22a<sub>2u</sub><sup>1</sup>23a<sub>1g</sub><sup>2</sup>33e<sub>u</sub><sup>4</sup>3a<sub>1u</sub><sup>1</sup></b> }          | 4.13                   |
| ${}^1A_{2g}$ | {...22a <sub>1g</sub> <sup>2</sup> 31e <sub>u</sub> <sup>4</sup> 21a <sub>2u</sub> <sup>2</sup> 31e <sub>g</sub> <sup>4</sup> 12a <sub>1u</sub> <sup>2</sup> 11a <sub>2g</sub> <sup>2</sup> 32e <sub>g</sub> <sup>4</sup> 33e <sub>g</sub> <sup>4</sup> 32e <sub>u</sub> <sup>4</sup> <b>22a<sub>2u</sub><sup>1</sup>23a<sub>1g</sub><sup>2</sup>33e<sub>u</sub><sup>4</sup>3a<sub>1u</sub><sup>1</sup></b> }          | 4.16                   |
| ${}^3E_g$    | {...22a <sub>1g</sub> <sup>2</sup> 31e <sub>u</sub> <sup>4</sup> 21a <sub>2u</sub> <sup>2</sup> 31e <sub>g</sub> <sup>4</sup> 12a <sub>1u</sub> <sup>2</sup> 11a <sub>2g</sub> <sup>2</sup> 32e <sub>g</sub> <sup>4</sup> 33e <sub>g</sub> <sup>4</sup> <b>32e<sub>u</sub><sup>3</sup>22a<sub>2u</sub><sup>2</sup>23a<sub>1g</sub><sup>2</sup>33e<sub>u</sub><sup>4</sup>3a<sub>1u</sub><sup>1</sup></b> }             | 4.42                   |
| ${}^1E_g$    | {...22a <sub>1g</sub> <sup>2</sup> 31e <sub>u</sub> <sup>4</sup> 21a <sub>2u</sub> <sup>2</sup> 31e <sub>g</sub> <sup>4</sup> 12a <sub>1u</sub> <sup>2</sup> 11a <sub>2g</sub> <sup>2</sup> 32e <sub>g</sub> <sup>4</sup> 33e <sub>g</sub> <sup>4</sup> <b>32e<sub>u</sub><sup>3</sup>22a<sub>2u</sub><sup>2</sup>23a<sub>1g</sub><sup>2</sup>33e<sub>u</sub><sup>4</sup>3a<sub>1u</sub><sup>1</sup></b> }             | 4.45                   |
| ${}^3E_u$    | {...22a <sub>1g</sub> <sup>2</sup> 31e <sub>u</sub> <sup>4</sup> 21a <sub>2u</sub> <sup>2</sup> 31e <sub>g</sub> <sup>4</sup> 12a <sub>1u</sub> <sup>2</sup> 11a <sub>2g</sub> <sup>2</sup> 32e <sub>g</sub> <sup>4</sup> <b>33e<sub>g</sub><sup>3</sup>32e<sub>u</sub><sup>4</sup>22a<sub>2u</sub><sup>2</sup>23a<sub>1g</sub><sup>2</sup>33e<sub>u</sub><sup>4</sup>3a<sub>1u</sub><sup>1</sup></b> }                | 4.72                   |
| ${}^1E_u$    | {...22a <sub>1g</sub> <sup>2</sup> 31e <sub>u</sub> <sup>4</sup> 21a <sub>2u</sub> <sup>2</sup> 31e <sub>g</sub> <sup>4</sup> 12a <sub>1u</sub> <sup>2</sup> 11a <sub>2g</sub> <sup>2</sup> 32e <sub>g</sub> <sup>4</sup> <b>33e<sub>g</sub><sup>3</sup>32e<sub>u</sub><sup>4</sup>22a<sub>2u</sub><sup>2</sup>23a<sub>1g</sub><sup>2</sup>33e<sub>u</sub><sup>4</sup>3a<sub>1u</sub><sup>1</sup></b> }                | 4.74                   |
| ${}^3E_u$    | {...22a <sub>1g</sub> <sup>2</sup> 31e <sub>u</sub> <sup>4</sup> 21a <sub>2u</sub> <sup>2</sup> 31e <sub>g</sub> <sup>4</sup> 12a <sub>1u</sub> <sup>2</sup> 11a <sub>2g</sub> <sup>2</sup> <b>32e<sub>g</sub><sup>3</sup>33e<sub>g</sub><sup>4</sup>32e<sub>u</sub><sup>4</sup>22a<sub>2u</sub><sup>2</sup>23a<sub>1g</sub><sup>2</sup>33e<sub>u</sub><sup>4</sup>3a<sub>1u</sub><sup>1</sup></b> }                   | 5.16                   |
| ${}^1E_u$    | {...22a <sub>1g</sub> <sup>2</sup> 31e <sub>u</sub> <sup>4</sup> 21a <sub>2u</sub> <sup>2</sup> 31e <sub>g</sub> <sup>4</sup> 12a <sub>1u</sub> <sup>2</sup> 11a <sub>2g</sub> <sup>2</sup> <b>32e<sub>g</sub><sup>3</sup>33e<sub>g</sub><sup>4</sup>32e<sub>u</sub><sup>4</sup>22a<sub>2u</sub><sup>2</sup>23a<sub>1g</sub><sup>2</sup>33e<sub>u</sub><sup>4</sup>3a<sub>1u</sub><sup>1</sup></b> }                   | 5.18                   |
| ${}^3A_{2u}$ | {...22a <sub>1g</sub> <sup>2</sup> 31e <sub>u</sub> <sup>4</sup> 21a <sub>2u</sub> <sup>2</sup> 31e <sub>g</sub> <sup>4</sup> 12a <sub>1u</sub> <sup>2</sup> <b>11a<sub>2g</sub><sup>1</sup>32e<sub>g</sub><sup>4</sup>33e<sub>g</sub><sup>4</sup>32e<sub>u</sub><sup>4</sup>22a<sub>2u</sub><sup>2</sup>23a<sub>1g</sub><sup>2</sup>33e<sub>u</sub><sup>4</sup>3a<sub>1u</sub><sup>1</sup></b> }                      | 5.41                   |
| ${}^1A_{2u}$ | {...22a <sub>1g</sub> <sup>2</sup> 31e <sub>u</sub> <sup>4</sup> 21a <sub>2u</sub> <sup>2</sup> 31e <sub>g</sub> <sup>4</sup> 12a <sub>1u</sub> <sup>2</sup> <b>11a<sub>2g</sub><sup>1</sup>32e<sub>g</sub><sup>4</sup>33e<sub>g</sub><sup>4</sup>32e<sub>u</sub><sup>4</sup>22a<sub>2u</sub><sup>2</sup>23a<sub>1g</sub><sup>2</sup>33e<sub>u</sub><sup>4</sup>3a<sub>1u</sub><sup>1</sup></b> }                      | 5.43                   |
| ${}^3A_{1g}$ | {...22a <sub>1g</sub> <sup>2</sup> 31e <sub>u</sub> <sup>4</sup> 21a <sub>2u</sub> <sup>2</sup> 31e <sub>g</sub> <sup>4</sup> <b>12a<sub>1u</sub><sup>1</sup>11a<sub>2g</sub><sup>2</sup>32e<sub>g</sub><sup>4</sup>33e<sub>g</sub><sup>4</sup>32e<sub>u</sub><sup>4</sup>22a<sub>2u</sub><sup>2</sup>23a<sub>1g</sub><sup>2</sup>33e<sub>u</sub><sup>4</sup>3a<sub>1u</sub><sup>1</sup></b> }                         | 5.67                   |
| ${}^1A_{1g}$ | {...22a <sub>1g</sub> <sup>2</sup> 31e <sub>u</sub> <sup>4</sup> 21a <sub>2u</sub> <sup>2</sup> 31e <sub>g</sub> <sup>4</sup> <b>12a<sub>1u</sub><sup>1</sup>11a<sub>2g</sub><sup>2</sup>32e<sub>g</sub><sup>4</sup>33e<sub>g</sub><sup>4</sup>32e<sub>u</sub><sup>4</sup>22a<sub>2u</sub><sup>2</sup>23a<sub>1g</sub><sup>2</sup>33e<sub>u</sub><sup>4</sup>3a<sub>1u</sub><sup>1</sup></b> }                         | 5.69                   |
| ${}^3E_u$    | {...22a <sub>1g</sub> <sup>2</sup> 31e <sub>u</sub> <sup>4</sup> 21a <sub>2u</sub> <sup>2</sup> <b>31e<sub>g</sub><sup>3</sup>12a<sub>1u</sub><sup>2</sup>11a<sub>2g</sub><sup>2</sup>32e<sub>g</sub><sup>4</sup>33e<sub>g</sub><sup>4</sup>32e<sub>u</sub><sup>4</sup>22a<sub>2u</sub><sup>2</sup>23a<sub>1g</sub><sup>2</sup>33e<sub>u</sub><sup>4</sup>3a<sub>1u</sub><sup>1</sup></b> }                            | 5.88                   |
| ${}^1E_u$    | {...22a <sub>1g</sub> <sup>2</sup> 31e <sub>u</sub> <sup>4</sup> 21a <sub>2u</sub> <sup>2</sup> <b>31e<sub>g</sub><sup>3</sup>12a<sub>1u</sub><sup>2</sup>11a<sub>2g</sub><sup>2</sup>32e<sub>g</sub><sup>4</sup>33e<sub>g</sub><sup>4</sup>32e<sub>u</sub><sup>4</sup>22a<sub>2u</sub><sup>2</sup>23a<sub>1g</sub><sup>2</sup>33e<sub>u</sub><sup>4</sup>3a<sub>1u</sub><sup>1</sup></b> }                            | 5.91                   |
| ${}^3A_{2g}$ | {...22a <sub>1g</sub> <sup>2</sup> 31e <sub>u</sub> <sup>4</sup> <b>21a<sub>2u</sub><sup>1</sup>31e<sub>g</sub><sup>4</sup>12a<sub>1u</sub><sup>2</sup>11a<sub>2g</sub><sup>2</sup>32e<sub>g</sub><sup>4</sup>33e<sub>g</sub><sup>4</sup>32e<sub>u</sub><sup>4</sup>22a<sub>2u</sub><sup>2</sup>23a<sub>1g</sub><sup>2</sup>33e<sub>u</sub><sup>4</sup>3a<sub>1u</sub><sup>1</sup></b> }                               | 6.01                   |
| ${}^1A_{2g}$ | {...22a <sub>1g</sub> <sup>2</sup> 31e <sub>u</sub> <sup>4</sup> <b>21a<sub>2u</sub><sup>1</sup>31e<sub>g</sub><sup>4</sup>12a<sub>1u</sub><sup>2</sup>11a<sub>2g</sub><sup>2</sup>32e<sub>g</sub><sup>4</sup>33e<sub>g</sub><sup>4</sup>32e<sub>u</sub><sup>4</sup>22a<sub>2u</sub><sup>2</sup>23a<sub>1g</sub><sup>2</sup>33e<sub>u</sub><sup>4</sup>3a<sub>1u</sub><sup>1</sup></b> }                               | 6.03                   |
| ${}^3E_g$    | {...22a <sub>1g</sub> <sup>2</sup> <b>31e<sub>u</sub><sup>3</sup>21a<sub>2u</sub><sup>2</sup>31e<sub>g</sub><sup>4</sup>12a<sub>1u</sub><sup>2</sup>11a<sub>2g</sub><sup>2</sup>32e<sub>g</sub><sup>4</sup>33e<sub>g</sub><sup>4</sup>32e<sub>u</sub><sup>4</sup>22a<sub>2u</sub><sup>2</sup>23a<sub>1g</sub><sup>2</sup>33e<sub>u</sub><sup>4</sup>3a<sub>1u</sub><sup>1</sup></b> }                                  | 6.37                   |
| ${}^1E_g$    | {...22a <sub>1g</sub> <sup>2</sup> <b>31e<sub>u</sub><sup>3</sup>21a<sub>2u</sub><sup>2</sup>31e<sub>g</sub><sup>4</sup>12a<sub>1u</sub><sup>2</sup>11a<sub>2g</sub><sup>2</sup>32e<sub>g</sub><sup>4</sup>33e<sub>g</sub><sup>4</sup>32e<sub>u</sub><sup>4</sup>22a<sub>2u</sub><sup>2</sup>23a<sub>1g</sub><sup>2</sup>33e<sub>u</sub><sup>4</sup>3a<sub>1u</sub><sup>1</sup></b> }                                  | 6.39                   |
| ${}^3A_{1u}$ | {... <b>22a<sub>1g</sub><sup>1</sup>31e<sub>u</sub><sup>4</sup>21a<sub>2u</sub><sup>2</sup>31e<sub>g</sub><sup>4</sup>12a<sub>1u</sub><sup>2</sup>11a<sub>2g</sub><sup>2</sup>32e<sub>g</sub><sup>4</sup>33e<sub>g</sub><sup>4</sup>32e<sub>u</sub><sup>4</sup>22a<sub>2u</sub><sup>2</sup>23a<sub>1g</sub><sup>2</sup>33e<sub>u</sub><sup>4</sup>3a<sub>1u</sub><sup>1</sup></b> }                                    | 6.41                   |
| ${}^1A_{1u}$ | {... <b>22a<sub>1g</sub><sup>1</sup>31e<sub>u</sub><sup>4</sup>21a<sub>2u</sub><sup>2</sup>31e<sub>g</sub><sup>4</sup>12a<sub>1u</sub><sup>2</sup>11a<sub>2g</sub><sup>2</sup>32e<sub>g</sub><sup>4</sup>33e<sub>g</sub><sup>4</sup>32e<sub>u</sub><sup>4</sup>22a<sub>2u</sub><sup>2</sup>23a<sub>1g</sub><sup>2</sup>33e<sub>u</sub><sup>4</sup>3a<sub>1u</sub><sup>1</sup></b> }                                    | 6.43                   |

Table S8. The computed VDEs, electron configurations, and final electronic states using the generalized Koopmans' theorem for the B<sub>80</sub><sup>-</sup> (C<sub>2v</sub>, <sup>2</sup>B<sub>2</sub>) tube. The bold-face indicates the orbitals from which an electron is detached.

| State                       | Configuration                                                                                                                                                                                                                                                                                                                                                                                                                                  | Theo. VDE <sup>a</sup> |
|-----------------------------|------------------------------------------------------------------------------------------------------------------------------------------------------------------------------------------------------------------------------------------------------------------------------------------------------------------------------------------------------------------------------------------------------------------------------------------------|------------------------|
| <sup>1</sup> B <sub>2</sub> | {...47b <sub>1</sub> <sup>2</sup> 51a <sub>1</sub> <sup>2</sup> 45a <sub>2</sub> <sup>2</sup> 48b <sub>1</sub> <sup>2</sup> 48b <sub>2</sub> <sup>2</sup> 49b <sub>1</sub> <sup>2</sup> 49b <sub>2</sub> <sup>2</sup> 46a <sub>2</sub> <sup>2</sup> 52a <sub>1</sub> <sup>2</sup> 47a <sub>2</sub> <sup>2</sup> 53a <sub>1</sub> <sup>2</sup> 50b <sub>2</sub> <sup>2</sup> 50b <sub>1</sub> <sup>2</sup> <b>51b<sub>2</sub><sup>0</sup></b> } | 3.85                   |
| <sup>3</sup> A <sub>2</sub> | {...47b <sub>1</sub> <sup>2</sup> 51a <sub>1</sub> <sup>2</sup> 45a <sub>2</sub> <sup>2</sup> 48b <sub>1</sub> <sup>2</sup> 48b <sub>2</sub> <sup>2</sup> 49b <sub>1</sub> <sup>2</sup> 49b <sub>2</sub> <sup>2</sup> 46a <sub>2</sub> <sup>2</sup> 52a <sub>1</sub> <sup>2</sup> 47a <sub>2</sub> <sup>2</sup> 53a <sub>1</sub> <sup>2</sup> 50b <sub>2</sub> <sup>2</sup> <b>50b<sub>1</sub><sup>1</sup>51b<sub>2</sub><sup>1</sup></b> }    | 4.08                   |
| <sup>1</sup> A <sub>2</sub> | {...47b <sub>1</sub> <sup>2</sup> 51a <sub>1</sub> <sup>2</sup> 45a <sub>2</sub> <sup>2</sup> 48b <sub>1</sub> <sup>2</sup> 48b <sub>2</sub> <sup>2</sup> 49b <sub>1</sub> <sup>2</sup> 49b <sub>2</sub> <sup>2</sup> 46a <sub>2</sub> <sup>2</sup> 52a <sub>1</sub> <sup>2</sup> 47a <sub>2</sub> <sup>2</sup> 53a <sub>1</sub> <sup>2</sup> 50b <sub>2</sub> <sup>2</sup> <b>50b<sub>1</sub><sup>1</sup>51b<sub>2</sub><sup>1</sup></b> }    | 4.11                   |
| <sup>3</sup> A <sub>1</sub> | {...47b <sub>1</sub> <sup>2</sup> 51a <sub>1</sub> <sup>2</sup> 45a <sub>2</sub> <sup>2</sup> 48b <sub>1</sub> <sup>2</sup> 48b <sub>2</sub> <sup>2</sup> 49b <sub>1</sub> <sup>2</sup> 49b <sub>2</sub> <sup>2</sup> 46a <sub>2</sub> <sup>2</sup> 52a <sub>1</sub> <sup>2</sup> 47a <sub>2</sub> <sup>2</sup> 53a <sub>1</sub> <sup>2</sup> <b>50b<sub>2</sub><sup>1</sup>50b<sub>1</sub><sup>2</sup>51b<sub>2</sub><sup>1</sup></b> }       | 4.13                   |
| <sup>1</sup> A <sub>1</sub> | {...47b <sub>1</sub> <sup>2</sup> 51a <sub>1</sub> <sup>2</sup> 45a <sub>2</sub> <sup>2</sup> 48b <sub>1</sub> <sup>2</sup> 48b <sub>2</sub> <sup>2</sup> 49b <sub>1</sub> <sup>2</sup> 49b <sub>2</sub> <sup>2</sup> 46a <sub>2</sub> <sup>2</sup> 52a <sub>1</sub> <sup>2</sup> 47a <sub>2</sub> <sup>2</sup> 53a <sub>1</sub> <sup>2</sup> <b>50b<sub>2</sub><sup>1</sup>50b<sub>1</sub><sup>2</sup>51b<sub>2</sub><sup>1</sup></b> }       | 4.15                   |
| <sup>3</sup> B <sub>2</sub> | {...47b <sub>1</sub> <sup>2</sup> 51a <sub>1</sub> <sup>2</sup> 45a <sub>2</sub> <sup>2</sup> 48b <sub>1</sub> <sup>2</sup> 48b <sub>2</sub> <sup>2</sup> 49b <sub>1</sub> <sup>2</sup> 49b <sub>2</sub> <sup>2</sup> 46a <sub>2</sub> <sup>2</sup> 52a <sub>1</sub> <sup>2</sup> 47a <sub>2</sub> <sup>2</sup> <b>53a<sub>1</sub><sup>1</sup>50b<sub>2</sub><sup>2</sup>50b<sub>1</sub><sup>2</sup>51b<sub>2</sub><sup>1</sup></b> }          | 4.45                   |
| <sup>1</sup> B <sub>2</sub> | {...47b <sub>1</sub> <sup>2</sup> 51a <sub>1</sub> <sup>2</sup> 45a <sub>2</sub> <sup>2</sup> 48b <sub>1</sub> <sup>2</sup> 48b <sub>2</sub> <sup>2</sup> 49b <sub>1</sub> <sup>2</sup> 49b <sub>2</sub> <sup>2</sup> 46a <sub>2</sub> <sup>2</sup> 52a <sub>1</sub> <sup>2</sup> 47a <sub>2</sub> <sup>2</sup> <b>53a<sub>1</sub><sup>1</sup>50b<sub>2</sub><sup>2</sup>50b<sub>1</sub><sup>2</sup>51b<sub>2</sub><sup>1</sup></b> }          | 4.47                   |
| <sup>3</sup> B <sub>1</sub> | {...47b <sub>1</sub> <sup>2</sup> 51a <sub>1</sub> <sup>2</sup> 45a <sub>2</sub> <sup>2</sup> 48b <sub>1</sub> <sup>2</sup> 48b <sub>2</sub> <sup>2</sup> 49b <sub>1</sub> <sup>2</sup> 49b <sub>2</sub> <sup>2</sup> 46a <sub>2</sub> <sup>2</sup> 52a <sub>1</sub> <sup>2</sup> <b>47a<sub>2</sub><sup>1</sup>53a<sub>1</sub><sup>2</sup>50b<sub>2</sub><sup>2</sup>50b<sub>1</sub><sup>2</sup>51b<sub>2</sub><sup>1</sup></b> }             | 4.58                   |
| <sup>1</sup> B <sub>1</sub> | {...47b <sub>1</sub> <sup>2</sup> 51a <sub>1</sub> <sup>2</sup> 45a <sub>2</sub> <sup>2</sup> 48b <sub>1</sub> <sup>2</sup> 48b <sub>2</sub> <sup>2</sup> 49b <sub>1</sub> <sup>2</sup> 49b <sub>2</sub> <sup>2</sup> 46a <sub>2</sub> <sup>2</sup> 52a <sub>1</sub> <sup>2</sup> <b>47a<sub>2</sub><sup>1</sup>53a<sub>1</sub><sup>2</sup>50b<sub>2</sub><sup>2</sup>50b<sub>1</sub><sup>2</sup>51b<sub>2</sub><sup>1</sup></b> }             | 4.61                   |
| <sup>3</sup> B <sub>2</sub> | {...47b <sub>1</sub> <sup>2</sup> 51a <sub>1</sub> <sup>2</sup> 45a <sub>2</sub> <sup>2</sup> 48b <sub>1</sub> <sup>2</sup> 48b <sub>2</sub> <sup>2</sup> 49b <sub>1</sub> <sup>2</sup> 49b <sub>2</sub> <sup>2</sup> 46a <sub>2</sub> <sup>2</sup> <b>52a<sub>1</sub><sup>1</sup>47a<sub>2</sub><sup>2</sup>53a<sub>1</sub><sup>2</sup>50b<sub>2</sub><sup>2</sup>50b<sub>1</sub><sup>2</sup>51b<sub>2</sub><sup>1</sup></b> }                | 4.85                   |
| <sup>1</sup> B <sub>2</sub> | {...47b <sub>1</sub> <sup>2</sup> 51a <sub>1</sub> <sup>2</sup> 45a <sub>2</sub> <sup>2</sup> 48b <sub>1</sub> <sup>2</sup> 48b <sub>2</sub> <sup>2</sup> 49b <sub>1</sub> <sup>2</sup> 49b <sub>2</sub> <sup>2</sup> 46a <sub>2</sub> <sup>2</sup> <b>52a<sub>1</sub><sup>1</sup>47a<sub>2</sub><sup>2</sup>53a<sub>1</sub><sup>2</sup>50b<sub>2</sub><sup>2</sup>50b<sub>1</sub><sup>2</sup>51b<sub>2</sub><sup>1</sup></b> }                | 4.87                   |
| <sup>3</sup> B <sub>1</sub> | {...47b <sub>1</sub> <sup>2</sup> 51a <sub>1</sub> <sup>2</sup> 45a <sub>2</sub> <sup>2</sup> 48b <sub>1</sub> <sup>2</sup> 48b <sub>2</sub> <sup>2</sup> 49b <sub>1</sub> <sup>2</sup> 49b <sub>2</sub> <sup>2</sup> <b>46a<sub>2</sub><sup>1</sup>52a<sub>1</sub><sup>2</sup>47a<sub>2</sub><sup>2</sup>53a<sub>1</sub><sup>2</sup>50b<sub>2</sub><sup>2</sup>50b<sub>1</sub><sup>2</sup>51b<sub>2</sub><sup>1</sup></b> }                   | 4.89                   |
| <sup>1</sup> B <sub>1</sub> | {...47b <sub>1</sub> <sup>2</sup> 51a <sub>1</sub> <sup>2</sup> 45a <sub>2</sub> <sup>2</sup> 48b <sub>1</sub> <sup>2</sup> 48b <sub>2</sub> <sup>2</sup> 49b <sub>1</sub> <sup>2</sup> 49b <sub>2</sub> <sup>2</sup> <b>46a<sub>2</sub><sup>1</sup>52a<sub>1</sub><sup>2</sup>47a<sub>2</sub><sup>2</sup>53a<sub>1</sub><sup>2</sup>50b<sub>2</sub><sup>2</sup>50b<sub>1</sub><sup>2</sup>51b<sub>2</sub><sup>1</sup></b> }                   | 4.92                   |
| <sup>3</sup> A <sub>1</sub> | {...47b <sub>1</sub> <sup>2</sup> 51a <sub>1</sub> <sup>2</sup> 45a <sub>2</sub> <sup>2</sup> 48b <sub>1</sub> <sup>2</sup> 48b <sub>2</sub> <sup>2</sup> 49b <sub>1</sub> <sup>2</sup> <b>49b<sub>2</sub><sup>1</sup>46a<sub>2</sub><sup>2</sup>52a<sub>1</sub><sup>2</sup>47a<sub>2</sub><sup>2</sup>53a<sub>1</sub><sup>2</sup>50b<sub>2</sub><sup>2</sup>50b<sub>1</sub><sup>2</sup>51b<sub>2</sub><sup>1</sup></b> }                      | 5.28                   |
| <sup>1</sup> A <sub>1</sub> | {...47b <sub>1</sub> <sup>2</sup> 51a <sub>1</sub> <sup>2</sup> 45a <sub>2</sub> <sup>2</sup> 48b <sub>1</sub> <sup>2</sup> 48b <sub>2</sub> <sup>2</sup> 49b <sub>1</sub> <sup>2</sup> <b>49b<sub>2</sub><sup>1</sup>46a<sub>2</sub><sup>2</sup>52a<sub>1</sub><sup>2</sup>47a<sub>2</sub><sup>2</sup>53a<sub>1</sub><sup>2</sup>50b<sub>2</sub><sup>2</sup>50b<sub>1</sub><sup>2</sup>51b<sub>2</sub><sup>1</sup></b> }                      | 5.31                   |
| <sup>3</sup> A <sub>2</sub> | {...47b <sub>1</sub> <sup>2</sup> 51a <sub>1</sub> <sup>2</sup> 45a <sub>2</sub> <sup>2</sup> 48b <sub>1</sub> <sup>2</sup> 48b <sub>2</sub> <sup>2</sup> <b>49b<sub>1</sub><sup>1</sup>49b<sub>2</sub><sup>2</sup>46a<sub>2</sub><sup>2</sup>52a<sub>1</sub><sup>2</sup>47a<sub>2</sub><sup>2</sup>53a<sub>1</sub><sup>2</sup>50b<sub>2</sub><sup>2</sup>50b<sub>1</sub><sup>2</sup>51b<sub>2</sub><sup>1</sup></b> }                         | 5.36                   |
| <sup>1</sup> A <sub>2</sub> | {...47b <sub>1</sub> <sup>2</sup> 51a <sub>1</sub> <sup>2</sup> 45a <sub>2</sub> <sup>2</sup> 48b <sub>1</sub> <sup>2</sup> 48b <sub>2</sub> <sup>2</sup> <b>49b<sub>1</sub><sup>1</sup>49b<sub>2</sub><sup>2</sup>46a<sub>2</sub><sup>2</sup>52a<sub>1</sub><sup>2</sup>47a<sub>2</sub><sup>2</sup>53a<sub>1</sub><sup>2</sup>50b<sub>2</sub><sup>2</sup>50b<sub>1</sub><sup>2</sup>51b<sub>2</sub><sup>1</sup></b> }                         | 5.38                   |
| <sup>3</sup> A <sub>1</sub> | {...47b <sub>1</sub> <sup>2</sup> 51a <sub>1</sub> <sup>2</sup> 45a <sub>2</sub> <sup>2</sup> 48b <sub>1</sub> <sup>2</sup> <b>48b<sub>2</sub><sup>1</sup>49b<sub>1</sub><sup>2</sup>49b<sub>2</sub><sup>2</sup>46a<sub>2</sub><sup>2</sup>52a<sub>1</sub><sup>2</sup>47a<sub>2</sub><sup>2</sup>53a<sub>1</sub><sup>2</sup>50b<sub>2</sub><sup>2</sup>50b<sub>1</sub><sup>2</sup>51b<sub>2</sub><sup>1</sup></b> }                            | 5.51                   |
| <sup>1</sup> A <sub>1</sub> | {...47b <sub>1</sub> <sup>2</sup> 51a <sub>1</sub> <sup>2</sup> 45a <sub>2</sub> <sup>2</sup> 48b <sub>1</sub> <sup>2</sup> <b>48b<sub>2</sub><sup>1</sup>49b<sub>1</sub><sup>2</sup>49b<sub>2</sub><sup>2</sup>46a<sub>2</sub><sup>2</sup>52a<sub>1</sub><sup>2</sup>47a<sub>2</sub><sup>2</sup>53a<sub>1</sub><sup>2</sup>50b<sub>2</sub><sup>2</sup>50b<sub>1</sub><sup>2</sup>51b<sub>2</sub><sup>1</sup></b> }                            | 5.53                   |
| <sup>3</sup> A <sub>2</sub> | {...47b <sub>1</sub> <sup>2</sup> 51a <sub>1</sub> <sup>2</sup> 45a <sub>2</sub> <sup>2</sup> <b>48b<sub>1</sub><sup>1</sup>48b<sub>2</sub><sup>2</sup>49b<sub>1</sub><sup>2</sup>49b<sub>2</sub><sup>2</sup>46a<sub>2</sub><sup>2</sup>52a<sub>1</sub><sup>2</sup>47a<sub>2</sub><sup>2</sup>53a<sub>1</sub><sup>2</sup>50b<sub>2</sub><sup>2</sup>50b<sub>1</sub><sup>2</sup>51b<sub>2</sub><sup>1</sup></b> }                               | 5.54                   |
| <sup>1</sup> A <sub>2</sub> | {...47b <sub>1</sub> <sup>2</sup> 51a <sub>1</sub> <sup>2</sup> 45a <sub>2</sub> <sup>2</sup> <b>48b<sub>1</sub><sup>1</sup>48b<sub>2</sub><sup>2</sup>49b<sub>1</sub><sup>2</sup>49b<sub>2</sub><sup>2</sup>46a<sub>2</sub><sup>2</sup>52a<sub>1</sub><sup>2</sup>47a<sub>2</sub><sup>2</sup>53a<sub>1</sub><sup>2</sup>50b<sub>2</sub><sup>2</sup>50b<sub>1</sub><sup>2</sup>51b<sub>2</sub><sup>1</sup></b> }                               | 5.56                   |
| <sup>3</sup> B <sub>1</sub> | {...47b <sub>1</sub> <sup>2</sup> 51a <sub>1</sub> <sup>2</sup> <b>45a<sub>2</sub><sup>1</sup>48b<sub>1</sub><sup>2</sup>48b<sub>2</sub><sup>2</sup>49b<sub>1</sub><sup>2</sup>49b<sub>2</sub><sup>2</sup>46a<sub>2</sub><sup>2</sup>52a<sub>1</sub><sup>2</sup>47a<sub>2</sub><sup>2</sup>53a<sub>1</sub><sup>2</sup>50b<sub>2</sub><sup>2</sup>50b<sub>1</sub><sup>2</sup>51b<sub>2</sub><sup>1</sup></b> }                                  | 6.05                   |
| <sup>1</sup> B <sub>1</sub> | {...47b <sub>1</sub> <sup>2</sup> 51a <sub>1</sub> <sup>2</sup> <b>45a<sub>2</sub><sup>1</sup>48b<sub>1</sub><sup>2</sup>48b<sub>2</sub><sup>2</sup>49b<sub>1</sub><sup>2</sup>49b<sub>2</sub><sup>2</sup>46a<sub>2</sub><sup>2</sup>52a<sub>1</sub><sup>2</sup>47a<sub>2</sub><sup>2</sup>53a<sub>1</sub><sup>2</sup>50b<sub>2</sub><sup>2</sup>50b<sub>1</sub><sup>2</sup>51b<sub>2</sub><sup>1</sup></b> }                                  | 6.07                   |
| <sup>3</sup> B <sub>2</sub> | {...47b <sub>1</sub> <sup>2</sup> <b>51a<sub>1</sub><sup>1</sup>45a<sub>2</sub><sup>2</sup>48b<sub>1</sub><sup>2</sup>48b<sub>2</sub><sup>2</sup>49b<sub>1</sub><sup>2</sup>49b<sub>2</sub><sup>2</sup>46a<sub>2</sub><sup>2</sup>52a<sub>1</sub><sup>2</sup>47a<sub>2</sub><sup>2</sup>53a<sub>1</sub><sup>2</sup>50b<sub>2</sub><sup>2</sup>50b<sub>1</sub><sup>2</sup>51b<sub>2</sub><sup>1</sup></b> }                                     | 6.09                   |
| <sup>1</sup> B <sub>2</sub> | {...47b <sub>1</sub> <sup>2</sup> <b>51a<sub>1</sub><sup>1</sup>45a<sub>2</sub><sup>2</sup>48b<sub>1</sub><sup>2</sup>48b<sub>2</sub><sup>2</sup>49b<sub>1</sub><sup>2</sup>49b<sub>2</sub><sup>2</sup>46a<sub>2</sub><sup>2</sup>52a<sub>1</sub><sup>2</sup>47a<sub>2</sub><sup>2</sup>53a<sub>1</sub><sup>2</sup>50b<sub>2</sub><sup>2</sup>50b<sub>1</sub><sup>2</sup>51b<sub>2</sub><sup>1</sup></b> }                                     | 6.11                   |
| <sup>3</sup> A <sub>2</sub> | {... <b>47b<sub>1</sub><sup>1</sup>51a<sub>1</sub><sup>2</sup>45a<sub>2</sub><sup>2</sup>48b<sub>1</sub><sup>2</sup>48b<sub>2</sub><sup>2</sup>49b<sub>1</sub><sup>2</sup>49b<sub>2</sub><sup>2</sup>46a<sub>2</sub><sup>2</sup>52a<sub>1</sub><sup>2</sup>47a<sub>2</sub><sup>2</sup>53a<sub>1</sub><sup>2</sup>50b<sub>2</sub><sup>2</sup>50b<sub>1</sub><sup>2</sup>51b<sub>2</sub><sup>1</sup></b> }                                       | 6.13                   |
| <sup>1</sup> A <sub>2</sub> | {... <b>47b<sub>1</sub><sup>1</sup>51a<sub>1</sub><sup>2</sup>45a<sub>2</sub><sup>2</sup>48b<sub>1</sub><sup>2</sup>48b<sub>2</sub><sup>2</sup>49b<sub>1</sub><sup>2</sup>49b<sub>2</sub><sup>2</sup>46a<sub>2</sub><sup>2</sup>52a<sub>1</sub><sup>2</sup>47a<sub>2</sub><sup>2</sup>53a<sub>1</sub><sup>2</sup>50b<sub>2</sub><sup>2</sup>50b<sub>1</sub><sup>2</sup>51b<sub>2</sub><sup>1</sup></b> }                                       | 6.15                   |

Table S9. The B–B bond lengths (in Å) of neutral B<sub>80</sub> optimized at the B3LYP/6-31G(d) and RI-MP2/6-31G(d) levels.

| B–B bond                                    | B3LYP/6-31G(d) | RI-MP2/6-31G(d) |
|---------------------------------------------|----------------|-----------------|
| Shared between two adjacent hexagons        | 1.665          | 1.716           |
| On the side of each pentagon                | 1.738          | 1.707           |
| Between the capping B atom and the vertex B | 1.702          | 1.712           |

Table S10. The C–C bond lengths (in Å) of neutral C<sub>60</sub> optimized at the B3LYP/6-31G(d) and RI-MP2/6-31G(d) levels, compared with the experimental data.

| C–C bond                             | B3LYP/6-31G(d) | RI-MP2/6-31G(d) | Exp. <sup>a</sup> |
|--------------------------------------|----------------|-----------------|-------------------|
| Shared between two adjacent hexagons | 1.385          | 1.408           | 1.391             |
| On the side of each pentagon         | 1.464          | 1.448           | 1.452             |

<sup>a</sup>From ref. [13].

Table S11. The Mulliken atomic charges of *I<sub>h</sub>* B<sub>80</sub> buckyball calculated at the B3LYP/6-31G(d) level.

| Boron atoms                                      | Mulliken atomic charge |
|--------------------------------------------------|------------------------|
| At the center of the hexagon (the capping atoms) | 0.206                  |
| At the vertexes of the hexagon                   | −0.063                 |

## References

1. L. S. Wang, *Int. Rev. Phys. Chem.*, 2016, **35**, 69-142.
2. X. Chen, Y. F. Zhao, Y. Y. Zhang and J. Li, *J. Comput. Chem.*, 2019, **40**, 1105-1112.
3. X. Chen, Y. F. Zhao, L. S. Wang and J. Li, *Comput. Theor. Chem.*, 2017, **1107**, 57-65.
4. Y. Zhao, X., Chen and J. Li, *Nano Research*, 2017, **10**, 3407-3420.
5. M. J. Frisch, G. W. Trucks, H. B. Schlegel, G. E. Scuseria, M. A. Robb, J. R. Cheeseman, G. Scalmani, V. Barone, B. Mennucci, G. A. Petersson, H. Nakatsuji, M. Caricato, X. Li, H. P. Hratchian, A. F. Izmaylov, J. Bloino, G. Zheng, J. L. Sonnenberg, M. Hada, M. Ehara, K. Toyota, R. Fukuda, J. Hasegawa, M. Ishida, T. Nakajima, Y. Honda, O. Kitao, H. Nakai, T. Vreven, J. A. Montgomery, Jr., J. E. Peralta, F. Ogliaro, M. Bearpark, J. J. Heyd, E. Brothers, K. N. Kudin, V. N. Staroverov, R. Kobayashi, J. Normand, K. Raghavachari, A. Rendell, J. C. Burant, S. S. Iyengar, J. Tomasi, M. Cossi, N. Rega, J. M. Millam, M. Klene, J. E. Knox, Jr., B. Cross, V. Bakken, C. Adamo, J. Jaramillo, R. Gomperts, R. E. Stratmann, O. Yazyev, A. J. Austin, R. Cammi, C. Pomelli, J. W. Ochterski, R. L. Martin, K. Morokuma, V. G. Zakrzewski, G. A. Voth, P. Salvador, J. J. Dannenberg, S. Dapprich, A. D. Daniels, Ö. Farkas, J. B. Foresman, J. V. Ortiz, J. Cioslowski and D. J. Fox., Gaussian 16, Wallingford, CT (2016).
6. A. D. Becke, *Phys. Rev. A*, 1988, **38**, 3098-3100.
7. C. Lee, W. Yang and R. G. Parr, *Phys. Rev. B*, 1988, **37**, 785-789.
8. C. Adamo and V. Barone, *J. Chem. Phys.*, 1999, **110**, 6158-6170.
9. V. A. Rassolov, M. A. Ratner, J. A. Pople, P. C. Redfern and L. A. Curtiss, *J. Comput. Chem.*, 2001, **22**, 976-984.
10. F. Weigend and R. Ahlrichs, *Phys. Chem. Chem. Phys.*, 2005, **7**, 3297-33054.
11. F. Neese, *Wiley Interdiscip. Rev.: Comput. Mol. Sci.*, 2012, **2**, 73-78.
12. D. Y. Zubarev and A. I. Boldyrev, *Phys. Chem. Chem. Phys.*, 2008, **10**, 5207-5217.
13. E. F. Sheka, B. S. Razbirin and D. K. Nelson, *J. Phys. Chem. A*, 2011, **115**, 3480-3490.

**Table S12.** Cartesian coordinates of the buckyball ( $I_h$ ), core-shell ( $C_I$ ), sphere ( $D_{3d}$ ), sphere ( $C_{3v}$ ), volleyball ( $T_h$ ), quasi-planar ( $C_s$ ), and tube ( $D_{10d}$ ) isomers of neutral  $B_{80}$  optimized at the B3LYP/6-31G(d) level.

| $(I_h)$ Buckyball |             |             |             |
|-------------------|-------------|-------------|-------------|
| B                 | -3.20740200 | -2.73904400 | -0.42134100 |
| B                 | -2.50992200 | -2.77474800 | -2.01633000 |
| B                 | -2.63760900 | -1.43595800 | -3.00741600 |
| B                 | -3.46537100 | -0.01236800 | -2.43953300 |
| B                 | -4.13615500 | 0.01143300  | -0.91851700 |
| B                 | -3.98994300 | 1.42863800  | 0.07558500  |
| B                 | -3.77725700 | 0.91022200  | 1.72403900  |
| B                 | -3.78799000 | -0.82272700 | 1.74722300  |
| B                 | -4.00593900 | -1.38154200 | 0.11313700  |
| B                 | -2.14214500 | -3.59712300 | 0.64963700  |
| B                 | -1.92147100 | -3.06421500 | 2.20888000  |
| B                 | -2.76441800 | -1.65040300 | 2.77700400  |
| B                 | -2.74466500 | 1.75287200  | 2.73146600  |
| B                 | -1.88622800 | 3.14295700  | 2.12738400  |
| B                 | -0.29593500 | 3.15242400  | 2.83718000  |
| B                 | -0.16163600 | 1.75631100  | 3.84613500  |
| B                 | -1.67749100 | 0.89027500  | 3.78128700  |
| B                 | -1.68662100 | -0.77189800 | 3.80329100  |
| B                 | -0.18050100 | -1.65246800 | 3.89102000  |
| B                 | -0.33046000 | -3.07223500 | 2.91810600  |
| B                 | 0.97579800  | -3.60719300 | 2.02459000  |
| B                 | 0.73785300  | -4.15539900 | 0.38931600  |
| B                 | 2.10122500  | -3.63728100 | -0.55460300 |
| B                 | 1.88623100  | -3.14296000 | -2.12738600 |
| B                 | 2.74466600  | -1.75287700 | -2.73146600 |
| B                 | 1.67748900  | -0.89027600 | -3.78129000 |
| B                 | 1.68662200  | 0.77189700  | -3.80329700 |
| B                 | 0.18050100  | 1.65246500  | -3.89102400 |
| B                 | 0.33046100  | 3.07223900  | -2.91810400 |
| B                 | -0.97579500 | 3.60719300  | -2.02458700 |
| B                 | -0.73785400 | 4.15540400  | -0.38931700 |
| B                 | 0.78426400  | 4.15579800  | 0.28057300  |
| B                 | 2.14214300  | 3.59712600  | -0.64963700 |
| B                 | 1.92147100  | 3.06422000  | -2.20888200 |
| B                 | 2.76441700  | 1.65040100  | -2.77700200 |
| B                 | 3.78798700  | 0.82272600  | -1.74722200 |
| B                 | 4.00594500  | 1.38154300  | -0.11313400 |
| B                 | 4.13615400  | -0.01142900 | 0.91851700  |
| B                 | 3.46536900  | 0.01237200  | 2.43953200  |
| B                 | 2.63761400  | 1.43595900  | 3.00742000  |
| B                 | 1.27150200  | 0.91819300  | 3.92974600  |
| B                 | 1.26196800  | -0.82847300 | 3.95283800  |
| B                 | 2.62276400  | -1.38587100 | 3.04534600  |
| B                 | 2.47992700  | -2.74928000 | 2.08954800  |
| B                 | 3.17643500  | -2.76257200 | 0.49429800  |
| B                 | 3.98994200  | -1.42864100 | -0.07558900 |
| B                 | 3.77726200  | -0.91022700 | -1.72403900 |
| B                 | -0.78426200 | -4.15579200 | -0.28057200 |
| B                 | -1.01651000 | -3.64926100 | -1.92968700 |
| B                 | 0.29593400  | -3.15242200 | -2.83717900 |

|                                   |             |             |             |
|-----------------------------------|-------------|-------------|-------------|
| B                                 | 0.16163600  | -1.75631400 | -3.84613900 |
| B                                 | -1.27150500 | -0.91819400 | -3.92975000 |
| B                                 | -1.26196600 | 0.82847000  | -3.95283800 |
| B                                 | -2.62277100 | 1.38587000  | -3.04534500 |
| B                                 | -3.17643800 | 2.76257200  | -0.49430300 |
| B                                 | -2.10122100 | 3.63727600  | 0.55460300  |
| B                                 | 1.01650900  | 3.64926100  | 1.92968700  |
| B                                 | 2.50992700  | 2.77475100  | 2.01633100  |
| B                                 | 3.20740400  | 2.73904600  | 0.42134600  |
| B                                 | -2.47993500 | 2.74928100  | -2.08954700 |
| B                                 | 0.19659200  | -0.05229600 | -3.88958500 |
| B                                 | -0.56620900 | -3.53877200 | 1.29273900  |
| B                                 | -2.88894000 | 2.22824400  | 1.09798200  |
| B                                 | 2.88890300  | -2.22821900 | -1.09797000 |
| B                                 | -3.26317400 | -1.36214200 | -1.42044700 |
| B                                 | -0.19659400 | 0.05229400  | 3.88961300  |
| B                                 | 0.56620500  | 3.53875000  | -1.29272900 |
| B                                 | 3.26313800  | 1.36212800  | 1.42043400  |
| B                                 | -2.90907300 | -2.16254600 | 1.15427700  |
| B                                 | -2.62933800 | 0.04918100  | 2.64749100  |
| B                                 | 1.09226500  | -2.12613600 | 2.86390100  |
| B                                 | 3.24241700  | -1.35857700 | 1.45420500  |
| B                                 | 2.62935300  | -0.04918500 | -2.64750800 |
| B                                 | -3.24235900 | 1.35855100  | -1.45417800 |
| B                                 | -0.52560200 | 3.57307600  | 1.19793100  |
| B                                 | 2.90909100  | 2.16256200  | -1.15428200 |
| B                                 | 0.52560400  | -3.57308800 | -1.19793400 |
| B                                 | -1.11571500 | -2.18845600 | -2.80664200 |
| B                                 | -1.09228200 | 2.12616300  | -2.86394000 |
| B                                 | 1.11571900  | 2.18846400  | 2.80665300  |
| <b>(C<sub>j</sub>) Core-shell</b> |             |             |             |
| B                                 | 2.86096100  | -3.54365600 | 0.34239700  |
| B                                 | 0.23796800  | 0.53707600  | -2.57586600 |
| B                                 | 2.52779200  | -1.65737800 | 2.40373200  |
| B                                 | 4.15244900  | -0.94763500 | 0.19397100  |
| B                                 | 3.96281700  | 0.57589500  | 0.67689200  |
| B                                 | 2.19854700  | 4.13930500  | -0.53779600 |
| B                                 | -2.67316900 | -1.60422100 | -3.00816500 |
| B                                 | 1.60783800  | -3.03933000 | -2.46149800 |
| B                                 | -0.42487800 | 0.09340800  | 0.75696500  |
| B                                 | 1.49894600  | -1.16808900 | 3.58292400  |
| B                                 | 0.48972000  | 1.50340300  | 0.25580100  |
| B                                 | -1.97531700 | 2.73600300  | 1.47212100  |
| B                                 | -2.99535300 | 1.30703600  | -2.52562800 |
| B                                 | -2.12199600 | 3.99171200  | 0.42341800  |
| B                                 | 1.14394200  | 3.43363000  | -1.74293800 |
| B                                 | -0.78178000 | 0.13338400  | 2.39908400  |
| B                                 | -0.16337300 | -1.27863700 | 3.62199000  |
| B                                 | -3.53495200 | -0.21046000 | -2.92204200 |
| B                                 | -1.17412200 | 1.40001400  | -0.24769800 |
| B                                 | -3.22684300 | 2.89226100  | -1.96295000 |
| B                                 | 3.08134400  | 1.15033200  | 2.01299300  |
| B                                 | -0.02762900 | 1.63630000  | 3.14480800  |

|   |             |             |             |
|---|-------------|-------------|-------------|
| B | 1.26358900  | -3.93820300 | 0.25983600  |
| B | 3.48564100  | -2.20560000 | 1.15565700  |
| B | 0.01153800  | -3.30355100 | -2.82236300 |
| B | -0.37699000 | -2.89495100 | -0.02754200 |
| B | -3.80710800 | -0.09176800 | 1.49972400  |
| B | -3.57595000 | -2.41406800 | -0.34506600 |
| B | -4.10125200 | 1.92093200  | -1.01856400 |
| B | -0.14099200 | -1.26382400 | -0.32216900 |
| B | 3.79708200  | -2.51217000 | -0.48382800 |
| B | 3.81469300  | 2.15591700  | 0.98299800  |
| B | -1.78162300 | -1.25180800 | 3.32125900  |
| B | -2.59743600 | -2.77236100 | -1.66822600 |
| B | -0.68536900 | 2.98394100  | 2.59391200  |
| B | -0.74761800 | -0.81237900 | -1.95313500 |
| B | 1.19526500  | -0.15474300 | 0.13098900  |
| B | 0.69946400  | 4.75393000  | -0.86766100 |
| B | 0.70894800  | 2.68840600  | 1.60087100  |
| B | -0.76909000 | 3.96444200  | 1.35698900  |
| B | -3.83082400 | -1.37626900 | -1.64984200 |
| B | -0.38883400 | 3.73753000  | -1.63611100 |
| B | -1.55093500 | -0.25716700 | -0.51592700 |
| B | 4.08074100  | 1.77825600  | -0.70014500 |
| B | 1.37762400  | 0.95055600  | -1.21781600 |
| B | -2.11975500 | -3.53940300 | -0.25860400 |
| B | -2.67857000 | 2.39684900  | -0.06020500 |
| B | -2.40344800 | -2.44470800 | 2.19596100  |
| B | -3.70366100 | -1.78921100 | 1.16300300  |
| B | -0.01063800 | 1.93878900  | -1.47875500 |
| B | -1.39102300 | 0.83270400  | -1.95203200 |
| B | -2.06082300 | 3.85881300  | -1.24485000 |
| B | 2.24258300  | -3.76958900 | -1.08669800 |
| B | 4.05190600  | -1.33485600 | -1.57137900 |
| B | 0.27087500  | -3.52622400 | 1.59733000  |
| B | -1.50329100 | -3.51554300 | 1.33015700  |
| B | 2.73182300  | 2.75873400  | -1.57216600 |
| B | -0.77191600 | -2.48863100 | 2.43723400  |
| B | 0.97276000  | -0.75949800 | -1.53549600 |
| B | 2.93603600  | 1.21709700  | -2.01679800 |
| B | 3.47432900  | 3.34155000  | -0.06888500 |
| B | -4.06274700 | 0.27648700  | -1.37705100 |
| B | -4.00190100 | 0.93992100  | 0.26179700  |
| B | 3.41994200  | -0.30062000 | -2.62726700 |
| B | 2.34291800  | 0.01468100  | 2.87713100  |
| B | -0.78933700 | 4.69882500  | -0.19889800 |
| B | 2.31903600  | -1.51949000 | -2.41756700 |
| B | -1.30990300 | -2.37802400 | -2.89717900 |
| B | 0.70331100  | 0.27800400  | 3.48952600  |
| B | -1.08373800 | -3.63341500 | -1.53482300 |
| B | -3.32388600 | -1.16757800 | 2.62735300  |
| B | 0.88887300  | -2.44176200 | 2.71045200  |
| B | -3.13652500 | -0.63951300 | -0.14720200 |
| B | 2.53868900  | -0.39925200 | 1.09859600  |
| B | 4.37960500  | 0.31625000  | -1.31201800 |

|                                |             |             |             |
|--------------------------------|-------------|-------------|-------------|
| B                              | 0.57752000  | -3.91814100 | -1.37589200 |
| B                              | -2.55221800 | 0.28582900  | 2.82906200  |
| B                              | 1.79589600  | 0.13746600  | -2.87527400 |
| B                              | 2.27081700  | 2.82624900  | 1.17642600  |
| B                              | -1.75701200 | 1.68181200  | 2.83865600  |
| <i>(D<sub>3d</sub>) Sphere</i> |             |             |             |
| B                              | -3.95837200 | 0.82000700  | -1.47246700 |
| B                              | -3.95718500 | -0.92025900 | -1.41405800 |
| B                              | -2.86241800 | -1.50780100 | -2.73549400 |
| B                              | -2.86376400 | 1.31868300  | -2.83075600 |
| B                              | -2.31194300 | -0.12655000 | -3.74082000 |
| B                              | -3.95770500 | 1.68434700  | -0.08495400 |
| B                              | -2.86269800 | 3.12293500  | 0.06575200  |
| B                              | -2.30997500 | 3.30268900  | 1.76387100  |
| B                              | -3.95614000 | 0.86469600  | 1.45126200  |
| B                              | -2.86054100 | 1.79179200  | 2.56079200  |
| B                              | -3.95600200 | -1.68967200 | 0.02825400  |
| B                              | -3.95531200 | -0.76904300 | 1.50613900  |
| B                              | -2.85885200 | -1.61855200 | 2.67516000  |
| B                              | -2.85969400 | -3.11394700 | 0.27496800  |
| B                              | -2.30693700 | -3.17909600 | 1.98125000  |
| B                              | -1.90419100 | -2.79460800 | -2.43249900 |
| B                              | -1.90274100 | -3.57828800 | -0.96365800 |
| B                              | -0.30349300 | -4.11763200 | -0.67462000 |
| B                              | -0.30563300 | -2.85373800 | -3.04349700 |
| B                              | 0.72626300  | -3.77686600 | -2.01547200 |
| B                              | -1.90643700 | 2.62330300  | -2.61422000 |
| B                              | -0.30804600 | 2.64293000  | -3.22806800 |
| B                              | 0.72281800  | 3.63388200  | -2.26400200 |
| B                              | -1.90600400 | 3.50358700  | -1.20128200 |
| B                              | -0.30729900 | 4.06289900  | -0.94915400 |
| B                              | -0.72849500 | -0.14391000 | -4.27809500 |
| B                              | 0.30298600  | -1.47414400 | -3.90310100 |
| B                              | 1.90184300  | -0.95229100 | -3.58151500 |
| B                              | 0.30182900  | 1.20935100  | -3.99340100 |
| B                              | 1.90109300  | 0.71156600  | -3.63737800 |
| B                              | 3.95837500  | -0.82000600 | 1.47246600  |
| B                              | 2.86376700  | -1.31868300 | 2.83075700  |
| B                              | 2.31194600  | 0.12655000  | 3.74082000  |
| B                              | 3.95718600  | 0.92026000  | 1.41405600  |
| B                              | 2.86242000  | 1.50780300  | 2.73549300  |
| B                              | 3.95770700  | -1.68434600 | 0.08495100  |
| B                              | 3.95613900  | -0.86469400 | -1.45126400 |
| B                              | 2.86053900  | -1.79178900 | -2.56079200 |
| B                              | 2.86269900  | -3.12293400 | -0.06575400 |
| B                              | 2.30997500  | -3.30268600 | -1.76387300 |
| B                              | 1.90643900  | -2.62330500 | 2.61422100  |
| B                              | 1.90600600  | -3.50359000 | 1.20128100  |
| B                              | 0.30730000  | -4.06290300 | 0.94915200  |
| B                              | 0.30804700  | -2.64293200 | 3.22807000  |
| B                              | -0.72282000 | -3.63388700 | 2.26400300  |
| B                              | 0.72849700  | 0.14391100  | 4.27809900  |
| B                              | -0.30182900 | -1.20935200 | 3.99340300  |

|                                |             |             |             |
|--------------------------------|-------------|-------------|-------------|
| B                              | -1.90109600 | -0.71156700 | 3.63738200  |
| B                              | -0.30298600 | 1.47414600  | 3.90310500  |
| B                              | -1.90184600 | 0.95229400  | 3.58151900  |
| B                              | 3.95600000  | 1.68967200  | -0.02825600 |
| B                              | 2.85969300  | 3.11394600  | -0.27497000 |
| B                              | 2.30693400  | 3.17909300  | -1.98125000 |
| B                              | 3.95530900  | 0.76904300  | -1.50614000 |
| B                              | 2.85884900  | 1.61855000  | -2.67515900 |
| B                              | 1.90419200  | 2.79461000  | 2.43249800  |
| B                              | 0.30563300  | 2.85374100  | 3.04349800  |
| B                              | -0.72626400 | 3.77686800  | 2.01547100  |
| B                              | 1.90274100  | 3.57828700  | 0.96365600  |
| B                              | 0.30349300  | 4.11763100  | 0.67461800  |
| B                              | 1.26917600  | 3.58276700  | -0.57133600 |
| B                              | 1.26860000  | 2.09202400  | -2.96514100 |
| B                              | 1.27034000  | -2.28462800 | -2.81753800 |
| B                              | 1.27281500  | -3.61281300 | -0.32991400 |
| B                              | -1.26917700 | -3.58277000 | 0.57133600  |
| B                              | -3.58584000 | -0.00146000 | 0.00207000  |
| B                              | -1.26860100 | -2.09202700 | 2.96514400  |
| B                              | 1.27395500  | -1.29655400 | 3.38702100  |
| B                              | 1.27283800  | 1.52202600  | 3.29249000  |
| B                              | -1.27034100 | 2.28463200  | 2.81754000  |
| B                              | -1.27281400 | 3.61281200  | 0.32991200  |
| B                              | -1.27395000 | 1.29655200  | -3.38701400 |
| B                              | -1.27283700 | -1.52202400 | -3.29249300 |
| B                              | 3.58584000  | 0.00146100  | -0.00207100 |
| B                              | -3.70125000 | 2.51010800  | 1.34222200  |
| B                              | -3.70276400 | -0.09691100 | -2.84295800 |
| B                              | -3.69888800 | -2.41784000 | 1.50744700  |
| B                              | 3.70276800  | 0.09691200  | 2.84295800  |
| B                              | 3.70124900  | -2.51010600 | -1.34222500 |
| B                              | 3.69888500  | 2.41783800  | -1.50744800 |
| <b>(C<sub>3v</sub>) Sphere</b> |             |             |             |
| B                              | -1.84367300 | 3.27099000  | -2.28540500 |
| B                              | -2.60108100 | 1.70964400  | -2.79906300 |
| B                              | -3.64784000 | 0.92723000  | -1.88457700 |
| B                              | -4.04163400 | 1.48160700  | -0.25438500 |
| B                              | -3.22521400 | 2.75607500  | 0.34811700  |
| B                              | -2.09799400 | 3.69593000  | -0.71248100 |
| B                              | -0.10846800 | 3.12755800  | -2.77988800 |
| B                              | 0.06777700  | 1.67789000  | -3.79286700 |
| B                              | -1.43268500 | 0.82409300  | -3.80439500 |
| B                              | -1.44301800 | -0.82227400 | -3.80147100 |
| B                              | -3.65929600 | -0.88929900 | -1.88071500 |
| B                              | -4.29148700 | 0.02861900  | 0.81183000  |
| B                              | -3.73121400 | 0.02837700  | 2.34933900  |
| B                              | -2.82898000 | 1.41958100  | 2.87707100  |
| B                              | -2.55837300 | 2.73708200  | 1.96055400  |
| B                              | -1.06995700 | 3.58460100  | 1.97262900  |
| B                              | -0.72602400 | 4.17675000  | 0.36783200  |
| B                              | 0.79330000  | 4.23228100  | -0.21724900 |
| B                              | 1.08761400  | 3.62175700  | -1.84820100 |

|   |             |             |             |
|---|-------------|-------------|-------------|
| B | 1.48852100  | 0.84578200  | -3.77870800 |
| B | 2.82431500  | 1.41036800  | -2.75051400 |
| B | 2.65526800  | 2.70347000  | -1.83247900 |
| B | 3.30768200  | 2.76051700  | -0.19214600 |
| B | 2.15713900  | 3.69745300  | 0.86136700  |
| B | 1.85374500  | 3.20617800  | 2.39246500  |
| B | 0.19099600  | 3.13812000  | 2.89982200  |
| B | -0.07939500 | 1.71096600  | 4.08376100  |
| B | -1.47817400 | 0.91518400  | 4.07307700  |
| B | -4.06020300 | -1.43187500 | -0.24831200 |
| B | 0.15165300  | -3.12858500 | 2.91321500  |
| B | -1.11488600 | -3.56275600 | 1.98750900  |
| B | -0.77870900 | -4.16550800 | 0.38484100  |
| B | 0.73996600  | -4.24174200 | -0.19960700 |
| B | 2.11054100  | -3.72080700 | 0.87655100  |
| B | 2.57753600  | -1.74718400 | 2.93159000  |
| B | 1.45950100  | -0.80550100 | 4.10304400  |
| B | -0.10073100 | -1.69296400 | 4.09083100  |
| B | -1.48937800 | -0.87970600 | 4.07677800  |
| B | -2.84639400 | -1.37188500 | 2.88292000  |
| B | -2.59232300 | -2.69660900 | 1.97196500  |
| B | -2.14445000 | -3.67177700 | -0.69719600 |
| B | -1.88531500 | -3.25744000 | -2.27192600 |
| B | -0.14832500 | -3.13866700 | -2.76759900 |
| B | 1.04182600  | -3.64239700 | -1.83323500 |
| B | 2.62085000  | -2.74414700 | -1.82123500 |
| B | 3.27207600  | -2.80217300 | -0.18036800 |
| B | 3.97465000  | -1.46131700 | 0.42137000  |
| B | 3.60840700  | -0.87454900 | 2.02326700  |
| B | 1.46954100  | 0.80398800  | 4.09972300  |
| B | 2.59933600  | 1.72685700  | 2.92473000  |
| B | 3.61916300  | 0.83767200  | 2.01979700  |
| B | 3.99275900  | 1.41335900  | 0.41544800  |
| B | 4.26086300  | -0.02796200 | -0.64822700 |
| B | 3.79091000  | -0.02833600 | -2.22879600 |
| B | 2.80661900  | -1.45733200 | -2.74458100 |
| B | 1.47781400  | -0.88054000 | -3.77502800 |
| B | 0.04658700  | -1.69487700 | -3.78610300 |
| B | -3.25965000 | -2.71353300 | 0.35967900  |
| B | -2.62259500 | -1.68853200 | -2.79166600 |
| B | 1.81339900  | -3.21932400 | 2.40555400  |
| B | 2.31029600  | 3.93146200  | -0.71029800 |
| B | -2.25806700 | 3.95422200  | 0.99191500  |
| B | -2.81806300 | 0.02531400  | 3.65379600  |
| B | 1.34452700  | -2.41310100 | 3.69600500  |
| B | 2.26079400  | -3.96309000 | -0.69408500 |
| B | 2.89596000  | -0.02577600 | -3.60895100 |
| B | -1.38329000 | 2.48037700  | -3.65212700 |
| B | -4.55295100 | 0.02699200  | -0.76274300 |
| B | -2.30759000 | -3.92125300 | 1.00813900  |
| B | 4.53801200  | -0.02610400 | 1.06056800  |
| B | 1.37473700  | 2.41126500  | 3.68632000  |
| B | -1.41465100 | -2.47815900 | -3.64164600 |

|                                   |             |             |             |
|-----------------------------------|-------------|-------------|-------------|
| B                                 | -2.73440100 | 2.13785600  | -1.14579400 |
| B                                 | -0.42845900 | 3.45041000  | -1.12799400 |
| B                                 | -2.75812500 | -2.10546100 | -1.13548300 |
| B                                 | -0.47209300 | -3.45069200 | -1.11429300 |
| B                                 | 0.03129100  | -0.00762200 | -3.45289700 |
| B                                 | -0.03413300 | 0.00814300  | 3.84680500  |
| B                                 | 3.23475600  | 1.30337400  | -1.09040900 |
| B                                 | 3.21856600  | -1.34853900 | -1.08508000 |
| <i>(T<sub>i</sub>)</i> Volleyball |             |             |             |
| B                                 | 2.28315300  | 3.25878900  | -1.64381900 |
| B                                 | 0.90667100  | 3.99810200  | -2.12165800 |
| B                                 | -2.64253300 | -2.90024400 | -1.77310500 |
| B                                 | -0.12361400 | 3.72755800  | 2.15035900  |
| B                                 | -1.19780200 | 2.46207000  | 2.58001800  |
| B                                 | 0.48238400  | -4.08656200 | 1.26615800  |
| B                                 | -0.83089400 | 1.49781200  | 3.94923900  |
| B                                 | -2.45102100 | -0.51599500 | -3.50175700 |
| B                                 | -2.92919400 | -1.22735100 | -2.01690400 |
| B                                 | 1.59284900  | -2.25935900 | 3.30043800  |
| B                                 | 1.64910600  | -2.91352300 | 1.71662200  |
| B                                 | 1.68876000  | 1.27719900  | -3.74845800 |
| B                                 | 3.12429700  | -2.83944800 | 0.84567300  |
| B                                 | -4.14263900 | -0.45342700 | -1.08444000 |
| B                                 | 3.83968800  | 0.75587600  | -1.79635800 |
| B                                 | 2.47718100  | 1.67826200  | -2.27978300 |
| B                                 | -2.82149600 | 2.53667200  | 2.03449600  |
| B                                 | -3.02111500 | 3.42296300  | 0.67681200  |
| B                                 | -2.28315900 | -3.25879000 | 1.64383100  |
| B                                 | -0.90668500 | -3.99812400 | 2.12164500  |
| B                                 | 2.64256300  | 2.90029400  | 1.77311600  |
| B                                 | 1.40960300  | 3.49542500  | 2.66502500  |
| B                                 | 0.12361700  | -3.72756500 | -2.15036300 |
| B                                 | -0.48238700 | 4.08651100  | -1.26617300 |
| B                                 | 0.83091600  | -1.49781200 | -3.94922100 |
| B                                 | 1.19781700  | -2.46209400 | -2.58002100 |
| B                                 | 2.45099400  | 0.51599400  | 3.50173500  |
| B                                 | -1.59291100 | 2.25942100  | -3.30049200 |
| B                                 | -1.68873100 | -1.27721300 | 3.74846700  |
| B                                 | -2.47716100 | -1.67824700 | 2.27978200  |
| B                                 | -3.12431700 | 2.83943100  | -0.84567600 |
| B                                 | 4.14265800  | 0.45347400  | 1.08446200  |
| B                                 | -3.83965800 | -0.75585600 | 1.79635300  |
| B                                 | 2.82153300  | -2.53675600 | -2.03454900 |
| B                                 | 1.36185900  | 2.72255800  | -3.05673500 |
| B                                 | -2.02034000 | -2.06550900 | -3.20442800 |
| B                                 | -1.40961000 | -3.49540800 | -2.66501800 |
| B                                 | 0.27902300  | 2.58647800  | 3.44182500  |
| B                                 | 0.37896900  | -3.24436000 | 2.81962000  |
| B                                 | -2.44775500 | 1.48398000  | 3.22872000  |
| B                                 | -3.56767300 | 0.31543900  | -2.40833600 |
| B                                 | 3.02722000  | -2.06311300 | 2.28149900  |
| B                                 | 2.70787400  | -1.09630800 | 3.57314100  |
| B                                 | 2.98846600  | 0.26296200  | -3.10273500 |

|                                     |             |             |             |
|-------------------------------------|-------------|-------------|-------------|
| B                                   | 1.80841300  | -3.90330600 | 0.32634800  |
| B                                   | 3.02107300  | -3.42294700 | -0.67679900 |
| B                                   | -3.67420200 | -2.13003800 | -0.76416800 |
| B                                   | -4.44665000 | -1.18877100 | 0.34254500  |
| B                                   | 3.48355900  | 2.32043000  | -1.04915000 |
| B                                   | -1.61816200 | 3.71325400  | 1.48593600  |
| B                                   | -1.36185800 | -2.72257400 | 3.05672900  |
| B                                   | 2.02036300  | 2.06553300  | 3.20443200  |
| B                                   | -0.27901100 | -2.58646200 | -3.44179800 |
| B                                   | -0.37895800 | 3.24431600  | -2.81964800 |
| B                                   | -1.64913600 | 2.91352000  | -1.71664000 |
| B                                   | 2.44780700  | -1.48400200 | -3.22871700 |
| B                                   | 1.89068100  | -0.27982900 | -4.20079900 |
| B                                   | 3.56760800  | -0.31544400 | 2.40829200  |
| B                                   | -3.02727200 | 2.06317300  | -2.28154600 |
| B                                   | -2.98842500 | -0.26296600 | 3.10274300  |
| B                                   | -1.80840500 | 3.90323500  | -0.32634700 |
| B                                   | 3.67425000  | 2.13009700  | 0.76419400  |
| B                                   | 2.92918100  | 1.22738200  | 2.01691400  |
| B                                   | -3.48353100 | -2.32039600 | 1.04912300  |
| B                                   | 1.61817500  | -3.71330600 | -1.48597400 |
| B                                   | 0.32611100  | 0.19911500  | -4.13869300 |
| B                                   | -1.17433800 | 0.64842800  | -3.93302200 |
| B                                   | -0.32609600 | -0.19914500 | 4.13873700  |
| B                                   | 1.17436800  | -0.64840800 | 3.93307800  |
| B                                   | -3.64640300 | 1.91345400  | 0.58393100  |
| B                                   | -4.11098500 | 0.40773300  | 0.47463000  |
| B                                   | 3.64634100  | -1.91343100 | -0.58396700 |
| B                                   | 4.11091800  | -0.40771400 | -0.47458000 |
| B                                   | 4.44659900  | 1.18878800  | -0.34252600 |
| B                                   | -1.12107600 | -3.97397600 | 0.49914600  |
| B                                   | -1.28530000 | -3.80961700 | -1.06345500 |
| B                                   | 1.12104200  | 3.97396700  | -0.49914900 |
| B                                   | 1.28530700  | 3.80959400  | 1.06344900  |
| B                                   | -2.70785000 | 1.09629400  | -3.57309800 |
| B                                   | -1.89064700 | 0.27981200  | 4.20084300  |
| <b>(C<sub>s</sub>) Quasi-planar</b> |             |             |             |
| B                                   | 4.51533400  | -3.24166200 | 0.44124000  |
| B                                   | 0.39731800  | -5.82465000 | -0.14773500 |
| B                                   | 3.17114000  | -2.46595500 | -0.56818000 |
| B                                   | 0.40179800  | -4.23026400 | -0.75710400 |
| B                                   | -2.47357700 | -4.21391700 | -0.39275300 |
| B                                   | 3.30192000  | -0.82820000 | -0.85075100 |
| B                                   | -1.03170100 | -3.35338800 | -0.80895900 |
| B                                   | 3.17119800  | 2.46592100  | -0.56823500 |
| B                                   | 0.41923000  | -0.84654700 | -1.18043700 |
| B                                   | -1.04673200 | -5.03674500 | -0.39212000 |
| B                                   | 3.27631900  | -4.20116900 | -0.26284600 |
| B                                   | 4.55403200  | -1.63100100 | 0.09027600  |
| B                                   | 3.30196000  | 0.82815700  | -0.85082200 |
| B                                   | 0.40186500  | 4.23026500  | -0.75715700 |
| B                                   | 1.80790000  | -4.95230100 | -0.17987400 |
| B                                   | -2.51774200 | 0.81442300  | -0.91299600 |

|   |             |             |             |
|---|-------------|-------------|-------------|
| B | -2.46777400 | -2.51469400 | -0.80015700 |
| B | -1.02738700 | 1.71735400  | -1.06048500 |
| B | 4.55408500  | 1.63095100  | 0.09021500  |
| B | -1.03165500 | 3.35339500  | -0.80897600 |
| B | -3.92390600 | -1.66307800 | -0.61720700 |
| B | -3.92391600 | 1.66314000  | -0.61726600 |
| B | -3.93567600 | -3.38450500 | -0.31976700 |
| B | -2.46776200 | 2.51473600  | -0.80025500 |
| B | 1.82294900  | -1.68138900 | -0.98786100 |
| B | -0.99163600 | 0.00001900  | -1.06557400 |
| B | -1.02739900 | -1.71733800 | -1.06046400 |
| B | 0.41923500  | 0.84657600  | -1.18048700 |
| B | -5.24984500 | 2.49377300  | 0.08994500  |
| B | -5.32590200 | 0.84909200  | -0.32383200 |
| B | -5.32588900 | -0.84899900 | -0.32379400 |
| B | -5.22886500 | -4.15820700 | 0.46556600  |
| B | -2.45728700 | -5.80433300 | 0.18586700  |
| B | -1.04841800 | -6.61898600 | 0.43424400  |
| B | 6.06365500  | -0.81161800 | 0.24118600  |
| B | 6.06366000  | 0.81154000  | 0.24123100  |
| B | 6.05590900  | 2.47717300  | 0.18021700  |
| B | 1.80798100  | 4.95232500  | -0.17994900 |
| B | 0.39738700  | 5.82462900  | -0.14772500 |
| B | -1.04666000 | 5.03677300  | -0.39217900 |
| B | -2.47350100 | 4.21392900  | -0.39269900 |
| B | -3.93562300 | 3.38455700  | -0.31974400 |
| B | 3.27638900  | 4.20116600  | -0.26288200 |
| B | 4.51538100  | 3.24161400  | 0.44113300  |
| B | -5.24992600 | -2.49372600 | 0.08980800  |
| B | -3.87448800 | -5.02278000 | 0.26714200  |
| B | 6.05584800  | -2.47724600 | 0.18023600  |
| B | 7.47241700  | 1.65026100  | 0.83210700  |
| B | 7.46633100  | -0.00005400 | 0.67769200  |
| B | 7.47238000  | -1.65037100 | 0.83208100  |
| B | -6.65550400 | 1.65284500  | 0.38920900  |
| B | -6.60942700 | 0.00004400  | 0.37782300  |
| B | -6.65552600 | -1.65275800 | 0.38918100  |
| B | -6.58253400 | -3.34271000 | 0.90539400  |
| B | -2.51773800 | -0.81438300 | -0.91302100 |
| B | 1.83642300  | -3.37493900 | -0.83024700 |
| B | 1.82299200  | 1.68137000  | -0.98791300 |
| B | 1.83649700  | 3.37493900  | -0.83031700 |
| B | 1.79955000  | 6.60446300  | 0.53142200  |
| B | 3.21203500  | 5.76175100  | 0.44593400  |
| B | 4.59345400  | 4.93876700  | 0.57504800  |
| B | 6.00680600  | 4.12290700  | 0.75370200  |
| B | 7.26778700  | 3.20410300  | 1.05673500  |
| B | -7.74929300 | 2.40062600  | 1.39495500  |
| B | -7.90515000 | 0.82818100  | 1.24647800  |
| B | -7.90516500 | -0.82811700 | 1.24645800  |
| B | -7.74937700 | -2.40057700 | 1.39482000  |
| B | 7.26775900  | -3.20421900 | 1.05668200  |
| B | 6.00675800  | -4.12299900 | 0.75368800  |

|                               |              |              |             |
|-------------------------------|--------------|--------------|-------------|
| B                             | 4.59337900   | -4.93882100  | 0.57507700  |
| B                             | 3.21194500   | -5.76177600  | 0.44598100  |
| B                             | 1.79945100   | -6.60448200  | 0.53137600  |
| B                             | 0.37375300   | -7.23111000  | 0.74508500  |
| B                             | 0.37385400   | 7.23109000   | 0.74512000  |
| B                             | -1.04832700  | 6.61900800   | 0.43424200  |
| B                             | -2.45719800  | 5.80436000   | 0.18588400  |
| B                             | -3.87438900  | 5.02279800   | 0.26721100  |
| B                             | -5.22878200  | 4.15825200   | 0.46566200  |
| B                             | -6.58243800  | 3.34276100   | 0.90554500  |
| B                             | 4.43804800   | -0.00002000  | 0.25387500  |
| <i>(D<sub>10d</sub>)</i> Tube |              |              |             |
| B                             | -10.17195600 | -0.91989800  | 0.75726000  |
| B                             | -0.68136400  | -10.17306400 | 0.75654300  |
| B                             | -9.88721100  | -2.49588600  | 0.75536900  |
| B                             | -9.38973900  | -4.01787300  | 0.75759200  |
| B                             | -8.63183000  | -5.42867900  | 0.75582300  |
| B                             | -7.68828800  | -6.72238700  | 0.75809100  |
| B                             | -6.53151200  | -7.82994500  | 0.75628300  |
| B                             | -5.23436800  | -8.76876400  | 0.75847200  |
| B                             | -3.79196800  | -9.46471400  | 0.75652100  |
| B                             | -2.26824500  | -9.95691100  | 0.75857600  |
| B                             | 10.17450100  | -0.68157200  | 0.75678600  |
| B                             | 0.91988400   | -10.17049900 | 0.75849300  |
| B                             | 9.95821700   | -2.26847100  | 0.75865700  |
| B                             | 9.46616100   | -3.79220900  | 0.75648800  |
| B                             | 8.77002700   | -5.23455700  | 0.75838400  |
| B                             | 7.83094900   | -6.53147700  | 0.75634600  |
| B                             | 6.72301400   | -7.68794200  | 0.75825900  |
| B                             | 5.42901500   | -8.63105900  | 0.75633200  |
| B                             | 4.01798100   | -9.38861200  | 0.75829500  |
| B                             | 2.49591700   | -9.88587800  | 0.75641300  |
| B                             | -10.17455100 | 0.68132100   | 0.75522300  |
| B                             | -0.91991600  | 10.17064900  | 0.76015100  |
| B                             | -9.95823200  | 2.26815900   | 0.75733700  |
| B                             | -9.46588700  | 3.79180600   | 0.75552200  |
| B                             | -8.76972000  | 5.23409600   | 0.75783700  |
| B                             | -7.83071700  | 6.53108700   | 0.75619700  |
| B                             | -6.72286100  | 7.68759900   | 0.75862200  |
| B                             | -5.42899900  | 8.63092500   | 0.75703900  |
| B                             | -4.01803600  | 9.38860500   | 0.75946900  |
| B                             | -2.49594300  | 9.88576400   | 0.75778900  |
| B                             | 10.17168200  | 0.91965000   | 0.75907400  |
| B                             | 0.68130500   | 10.17336400  | 0.75826200  |
| B                             | 9.88675500   | 2.49566900   | 0.75722000  |
| B                             | 9.38945300   | 4.01771600   | 0.75959000  |
| B                             | 8.63160300   | 5.42862200   | 0.75773900  |
| B                             | 7.68814400   | 6.72237900   | 0.76013300  |
| B                             | 6.53144200   | 7.83011600   | 0.75823000  |
| B                             | 5.23437600   | 8.76900600   | 0.76048000  |
| B                             | 3.79185600   | 9.46484100   | 0.75845600  |
| B                             | 2.26823700   | 9.95733100   | 0.76049400  |
| B                             | -10.05229800 | -1.71253100  | -0.75815400 |

|   |              |              |             |
|---|--------------|--------------|-------------|
| B | 0.11917800   | -10.21144300 | -0.75895600 |
| B | -9.67576200  | -3.26919100  | -0.76005100 |
| B | -9.03119300  | -4.73496200  | -0.75777200 |
| B | -8.19200000  | -6.09903600  | -0.75956400 |
| B | -7.12596400  | -7.29381400  | -0.75729300 |
| B | -5.90627800  | -8.33174500  | -0.75912100 |
| B | -4.52313400  | -9.13850700  | -0.75697500 |
| B | -3.04240900  | -9.74874100  | -0.75890500 |
| B | -1.47762500  | -10.08851500 | -0.75691300 |
| B | 10.21227400  | 0.11921900   | -0.75860400 |
| B | 1.71235800   | -10.05106900 | -0.75704700 |
| B | 10.08933700  | -1.47757300  | -0.75671700 |
| B | 9.74960000   | -3.04236700  | -0.75896500 |
| B | 9.13916400   | -4.52297500  | -0.75702100 |
| B | 8.33226700   | -5.90605600  | -0.75915700 |
| B | 7.29409500   | -7.12549200  | -0.75719100 |
| B | 6.09907400   | -8.19128600  | -0.75921300 |
| B | 4.73479100   | -9.03008300  | -0.75719400 |
| B | 3.26904100   | -9.67473600  | -0.75912800 |
| B | -10.21224200 | -0.11928900  | -0.76028100 |
| B | -1.71228900  | 10.05157400  | -0.75544800 |
| B | -10.08925600 | 1.47753000   | -0.75818500 |
| B | -9.74905200  | 3.04222200   | -0.76009700 |
| B | -9.13871600  | 4.52290800   | -0.75779300 |
| B | -8.33166500  | 5.90588700   | -0.75951300 |
| B | -7.29371000  | 7.12555000   | -0.75706000 |
| B | -6.09879100  | 8.19142800   | -0.75869700 |
| B | -4.73472900  | 9.03061600   | -0.75620000 |
| B | -3.26894200  | 9.67511100   | -0.75789900 |
| B | 10.05195300  | 1.71241000   | -0.75632400 |
| B | -0.11910200  | 10.21175600  | -0.75734800 |
| B | 9.67534600   | 3.26903100   | -0.75811500 |
| B | 9.03078200   | 4.73479500   | -0.75581100 |
| B | 8.19169200   | 6.09891400   | -0.75760000 |
| B | 7.12569000   | 7.29372100   | -0.75526600 |
| B | 5.90612300   | 8.33173700   | -0.75720700 |
| B | 4.52311100   | 9.13870800   | -0.75494700 |
| B | 3.04235600   | 9.74879700   | -0.75709400 |
| B | 1.47774200   | 10.08918900  | -0.75501900 |
